# Supplementary material for: Molecular growth of PAH-like systems induced by oxygen species: experimental and theoretical study of the reaction of naphthalene with HO (2Π3/2), O (3P), and O2 (3Σ−g)
Source: Royal Society of Chemistry journal article supplement (doi:10.1039/c5ra05129k), 2015-01-01
Supplement: c5ra05129k1.pdf [file c5ra05129k1.pdf]

# Molecular growth of PAH-like systems induced by oxygen species: experimental and theoretical study of the reaction of naphthalene with HO ( $^2\Pi_{3/2}$ ), O ( $^3P$ ), and O<sub>2</sub> ( $^3\Sigma_g^-$ ).

M. Scapinello, L. M. Martini, P. Tosi, A. Maranzana and G. Tonachini

## Electronic Supplementary Information

### CONTENT

|                                                                      |                 |
|----------------------------------------------------------------------|-----------------|
| <b>Section 1.</b> Validation of the computational level.             | <b>PAGE 2.</b>  |
| <b>Section 2.</b> Comparison with experimental data.                 | <b>PAGE 5.</b>  |
| <b>Section 3.</b> Possible roles of ozone and $^1\Delta_g$ dioxygen. | <b>PAGE 7.</b>  |
| <b>Section 4.</b> Possible formation of a hydroperoxide.             | <b>PAGE 8.</b>  |
| <b>Section 5.</b> Behavior of the rate constant curves.              | <b>PAGE 9.</b>  |
| <b>Section 6.</b> Kinetic simulations.                               | <b>PAGE 13.</b> |
| <b>Section 7.</b> Table of energies.                                 | <b>PAGE 15.</b> |
| <b>Section 8.</b> Emission Spectra.                                  | <b>PAGE 18.</b> |
| <b>Section 9.</b> Geometrical parameters.                            | <b>PAGE 21.</b> |

## Section 1.

### Theoretical Method Validation.

We like to specify that our investigation is not aimed to reproduce very accurate computational results, but rather to offer the description of some reaction pathways which explain the formation of oxygen-containing products (some of them with significant mass increase). However, the comparisons presented in this section could be of some interest. Thermodynamic and kinetic experimental data are used to validate the computational level chosen for this study [DFT(M06-2X)/cc-pVTZ//DFT(M06-2X)/6-311G(d,p) for energies and geometries; DFT(M06-2X)/6-311G(d,p) for the assessment of the thermochemistry].

Four reactions are considered, and a comparison is drawn in **Table S1** between our DFT reaction enthalpies and the relevant experimental data. Reaction #1, the formation of the benzyl radical from propargyl and but-1-ene-3-yne, was considered in a previous study.<sup>1</sup> Reaction #2 is the formation of benzene starting by recombination of two propargyl radicals.<sup>2</sup> Reaction #3 sees seven ethyne molecules put into relation with two benzyl radicals: it is not to be considered as a real reaction, yet it allows a “reaction” enthalpy comparison. Reaction #4 is the radical coupling of propargyl with atomic hydrogen, to get propyne.

Then, another comparison can be drawn with experimental data for the **rate constants** of the propargyl radical + ethyne reaction, calculated at DFT(M06-2X)/cc-pVTZ // DFT(M06-2X)/6-311G(d,p) level by using TST theory, at four different temperatures.<sup>3</sup> Calculated rate constants show a rather satisfactory agreement with the experimental rate constants, as reported in **Table S2**.

---

<sup>1</sup> D. Trogolo, A. Maranzana, G. Ghigo, G. Tonachini *J. Phys. Chem. A* 2014, **118**, 427–440.

<sup>2</sup> J. A. Miller, S. J. Klippenstein, *J. Phys. Chem. A* 2003, **107**, 7783–7799 (and refs therein).

<sup>3</sup> V.D. Knyazev, I.R. Slagle, *J. Phys. Chem. A*, 2002, **106**, 5613-5617.

**Table S1.** Experimental vs. theoretically assessed **reaction enthalpies** for cases 1-4.

| Reaction | $\Delta H/\text{kcal mol}^{-1}$    |                          |          |
|----------|------------------------------------|--------------------------|----------|
|          | experimental                       | theoretical              |          |
|          |                                    | DFT(M06-2X) <sup>g</sup> |          |
|          |                                    | <b>a</b>                 | <b>b</b> |
| <b>1</b> | $-101.9 \pm 1.5$ <sup>a,b,d</sup>  | -105.0                   | -103.7   |
| <b>2</b> | $-142.20 \pm 1.43$ <sup>a,c</sup>  | -149.6                   | -148.4   |
| <b>3</b> | $-280 \pm 1$ <sup>f,d</sup>        | -295.3                   | -291.3   |
| <b>4</b> | $-88.78 \pm 1.02$ <sup>a,e,f</sup> | -91.2                    | -91.1    |
|          | <i>Mean Signed Error</i>           | -7.04                    | -5.33    |
|          | <i>Mean Unsigned Error</i>         | 7.04                     | 5.33     |

<sup>a</sup>propargyl radical: ref 4; <sup>b</sup> but-1-ene-3-yne: ref 5; <sup>c</sup> benzene: ref 6; <sup>d</sup>benzyl radical: ref 4; <sup>e</sup>propyne: ref 7; <sup>f</sup>hydrogen atom and ethyne: ref 8; <sup>g</sup>column **a**: geometry optimization at 6-311G(d,p); column **b**: single point energy computation at cc-pVTZ on the 6-311G(d,p) optimum geometry; thermochemistry at 6-311G(d,p) for both columns

**Table S2.** Experimental vs. theoretically assessed rate constants for the propargyl radical + ethyne reaction.

| T /K | $k / \text{molec}^{-1} \text{cm}^3 \text{s}^{-1}$ |                        |
|------|---------------------------------------------------|------------------------|
|      | experiment                                        | DFT(M06-2X)            |
| 800  | $7.25 \times 10^{-16}$                            | $6.89 \times 10^{-16}$ |
| 900  | $1.46 \times 10^{-15}$                            | $1.92 \times 10^{-15}$ |
| 1000 | $2.55 \times 10^{-15}$                            | $4.44 \times 10^{-15}$ |
| 1100 | $4.03 \times 10^{-15}$                            | $8.98 \times 10^{-15}$ |

<sup>4</sup> W. Tsang, "Heats of Formation of Organic Free Radicals by Kinetic Methods", in: *Energetics of Organic Free Radicals*, J. A. Martinho Simoes, A. Greenberg, J. F. Liebman (Eds.), Blackie Academic and Professional, London, 1996, p. 22-58.

<sup>5</sup> W. R. Roth, O. Adamczak, R. Breuckmann, *Chem. Ber.*, 1991, **124**, 2499-2521.

<sup>6</sup> M. V. Roux, M. Temprado, J. S. Chickos, Y. Nagano, *J. Phys. Chem. Ref. Data*, 2008, **37**, 1855-1996.

<sup>7</sup> D. D. Wagman, J. E. Kilpatrick, K. S. Pitzer, F. D. Rossini, *J. Res. NBS*, 1945, **35**, 467-496.

<sup>8</sup> M. W. Chase, Jr *NIST-JANAF Thermochemical Tables, Fourth Edition*, *J. Phys. Chem. Ref. Data*, 1998, Monograph **9**, 1-1951.

Finally, a test was carried out on the HO· addition to naphthalene, for which experimental measures of the kinetic constant are available<sup>9</sup> (ranging 2.17 – 2.39 x 10<sup>-11</sup> molecule<sup>-1</sup> cm<sup>3</sup> s<sup>-1</sup>, which correspond to a  $\Delta G$  barriers of 6.77– 6.72 kcal mol<sup>-1</sup>). On the basis of our computed free energy barrier ( $\Delta G^\ddagger=7.42$  kcal mol<sup>-1</sup>), we estimate  $k = 1.09 \times 10^{-11}$ . Also this comparison is encouraging within the declared scope of our investigation.

One can find in the literature that the M06-2X has been used oftentimes so far. Rayne and Forest reported some isomerization enthalpies of large<sup>10</sup> and small<sup>11</sup> organic molecules. They concluded that “M062X functional appears to offer comparable isomerization energy prediction performance to the best performing currently available dispersion corrected functionals...”.

---

<sup>9</sup> R. Atkinson, *Chem. Rev.*, 1986, **86**, 69-201. P. T. Phouongphouang, Arey, J., *Environ. Sci. Technol.*, 2002, **36**, 1947 – 1952.

<sup>10</sup> S. Rayne, K. Forest, *Nature Precedings*, doi:10.1038/npre.2010.5183.1

<sup>11</sup> S. Rayne, K. Forest, *Journal of Molecular Structure: THEOCHEM*, 2010, **948**, 102–107.

## Section 2.

Reaction HO + naphthalene.

a) Definition of the addition “effective” rate constant,  $k_{\text{add,eff}}$ , to be reported with the H abstraction rate constant,  $k_{\text{abs}}$ , in a comparison to experimental data (in subsection b)

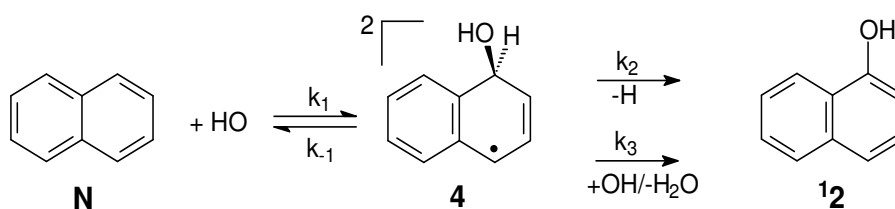

**N** = Naphthalene

$$-\frac{d[\mathbf{N}]}{dt} = k_1[\mathbf{N}][\text{HO}] - k_{-1}[\mathbf{4}]$$

$$-\frac{d[\mathbf{4}]}{dt} = k_{-1}[\mathbf{4}] + k_2[\mathbf{4}] + k_3[\mathbf{4}][\text{HO}] - k_1[\mathbf{4}][\text{HO}]$$

$$-\frac{d[\mathbf{4}]}{dt} = 0 \quad \text{Steady State}$$

$$[\mathbf{4}](k_{-1} + k_2 + k_3[\text{HO}]) = k_1[\mathbf{N}][\text{HO}]$$

$$[\mathbf{4}] = \frac{k_1[\mathbf{N}][\text{HO}]}{k_{-1} + k_2 + k_3[\text{HO}]}$$

$$-\frac{d[\mathbf{N}]}{dt} = k_1 \left( 1 - \frac{k_{-1}}{k_{-1} + k_2 + k_3[\text{HO}]} \right) [\mathbf{N}][\text{HO}] = \mathbf{k}_{\text{add,eff}}[\mathbf{N}][\text{HO}]$$

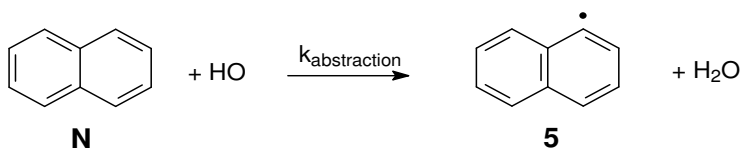

**b) Comparison with experimental data.**

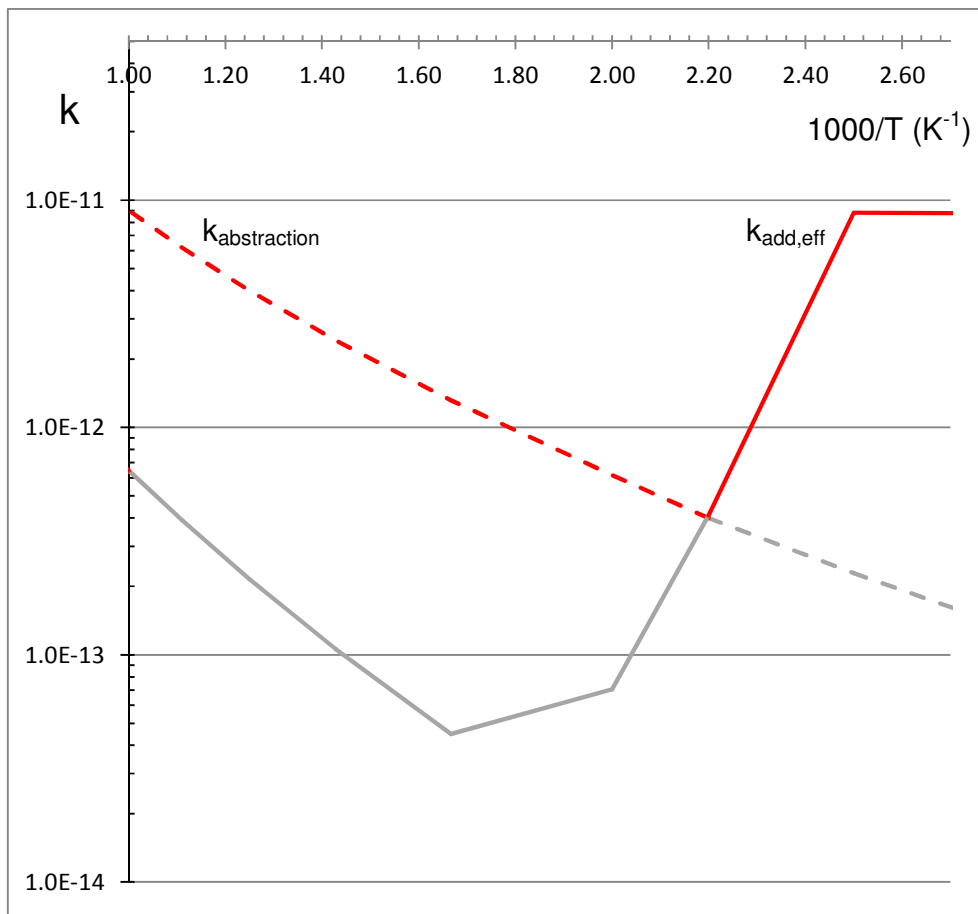

**Figure S1.** Rate constants ( $\text{molecule}^{-1} \text{ cm}^3 \text{ s}^{-1}$ ) for HO addition to naphthalene ( $k_{\text{add,eff}}$ , continuous line) vs H-abstraction ( $k_{\text{abs}}$ ) from its position 1 (broken line). At lower temperatures, addition is easier. Then, the two different slopes bring about a crossing at ca. 400-500 K.

The information conveyed by this plot can be compared with the kinetic results by Lorenz and Zellner<sup>12</sup> on the same system, later on integrated by further data gathered by other researchers.<sup>13</sup> All these data suggest a change in mechanism in the same temperature zone. The agreement seems fairly good, and supports the computational data reported in the main text.

<sup>12</sup> K. Lorenz, R. Zellner *Ber. Bunsenges. Phys. Chem.* 1983, **87**, 629-636.

<sup>13</sup> R. Atkinson *J Phys Chem Ref Data*, Monograph 1, 1989; in particular page 237.

## Section 3.

### Possible roles of ozone and $^1\Delta_g$ dioxygen.

(A) **Ozone** is known to form under the experiment conditions (from  $O + O_2$ ). Its reactivity is generally deemed less pronounced than those of HO or the O atom. Its reaction with PAHs has been the subject of some previous studies,<sup>14</sup> and a variety of poly-functional oxidized product species was suggested by a theoretical modelistic study, such as epoxy, ether, ketone, aldehyde, etc.

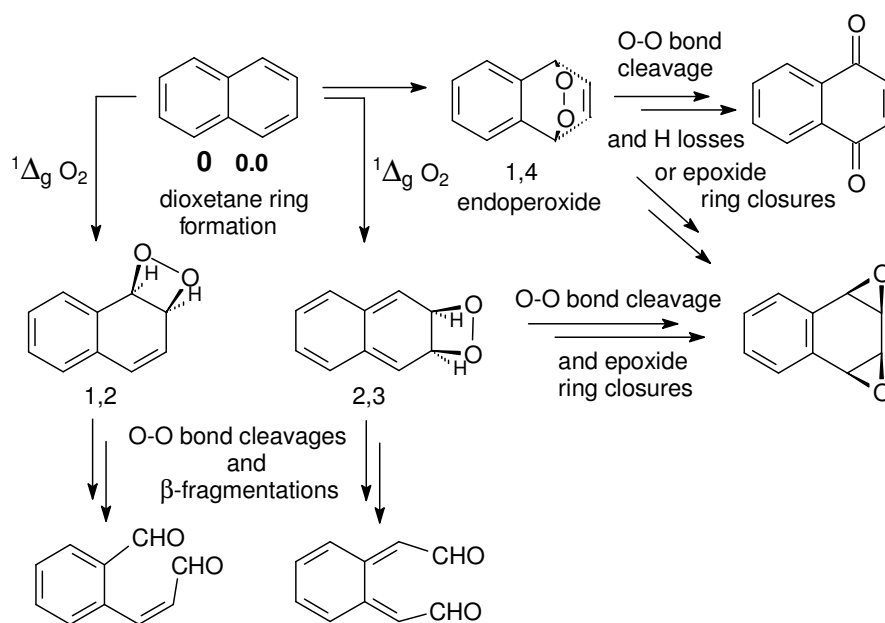

**Scheme S1.** Additions of  $^1\Delta_g$  dioxygen to naphthalene.

(B)  $^1\Delta_g$  dioxygen is expected to give  $[\pi 2+\pi 2]$  or  $[\pi 4+\pi 2]$  cycloadditions (Scheme S1). The former involves one couple of adjacent sites, with formation of a 4-membered ring, a dioxetane-like ring. The latter produces a 1,4-endoperoxide. From the dioxetane-like intermediates, an oxygen-oxygen bond cleavage usually induces the cleavage of the opposed carbon-carbon bond (a sort of  $\beta$ -fragmentation in each of the oxyl radicals potentially obtained). The final result would be a dialdehyde. Similarly *conceivable* is the formation of a diepoxide from the 2,3-dioxetane, following the cleavage of the oxygen-oxygen bond.

<sup>14</sup> A. Giordana, A. Maranzana, G. Ghigo, M. Causa, G. Tonachini, *J. Phys. Chem. A*, 2011, **115**, 470-481 and references therein.

However, none of these compounds has been detected in the experiment at 400 K. The Diels-Alder-like reaction could similarly be followed by oxygen-oxygen bond cleavage. The final stable product might again be a diepoxide, or, alternatively naphtho-1,4-quinone could form through subsequent H losses.

## Section 4.

**Possible formation of a hydroperoxide.** Considering the step in which the O atom reacts with the intermediate **1** (Scheme 1, main text), we saw that it does not abstract the hydrogen geminal to the oxyl group. It plunges instead onto the oxyl oxygen, giving the peroxy diradical **A** (Scheme S2). This is a simple spin coupling of localized unpaired electrons. In fact, the attraction of the oxyl radical center onto the incoming O atom is such that, even if it approaches in the direction of the geminal hydrogen, it is unavoidably funneled into the well corresponding to **A**. Then  $^1\Delta_g$  O<sub>2</sub> loss can produce naphthalene again with a barrier of ca. 10 kcal mol<sup>-1</sup> at T = 400 K. The other dissociation limit presenting the opposite spin situation,  $^3\Sigma_g^-$  O<sub>2</sub> + triplet naphthalene, is much higher in energy. As an alternative, a singlet hydroperoxide could in principle form by intramolecular H abstraction. But this process is not easy, since the barrier is 33.5 kcal mol<sup>-1</sup> and is not competitive with dioxygen loss. Actually, this product is not observed experimentally.

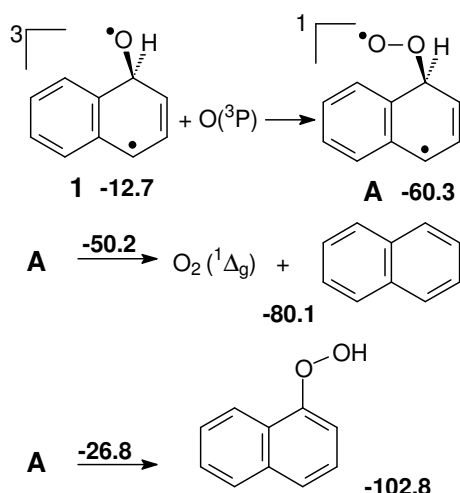

**Scheme S2.** Further O atom addition to **1** through radical coupling between the two oxygens.  $\Delta G$  values at the DFT(M06-2X)/cc-pVTZ//DFT(M06-2X)/6-311G(d,p) computational level. Then, fragmentation takes place, while formation of the hydroperoxide is sharply disadvantaged.



## Section 5.

### Behavior of the rate constant curves over a wider T range.

For  $X = \text{HO}$ , not only the slopes but also the behavior of  $k_{\text{add,eff}}$  (see Section 2a for a definition) and  $k_{\text{abs}}$  lines for each of the X species are different. Figure S2 displays a crossing of the red lines at ca. 850 K. For  $X = \text{O}$  atom the two blue lines begin at low T more far apart, rise both regularly, and show a crossing at a higher T than HO, ca. 1600 K. Thus, for both species addition is easier at lower temperatures. If both HO and O are present, addition carried out by the former dominates up to 700 K, by the latter in the range 700-1600 K. Then, H abstraction occurs faster at the highest temperatures, initially operated by the oxygen atom beyond 1700 K, then hydroxyl too, more slowly, beyond 2000 and 2300 K.

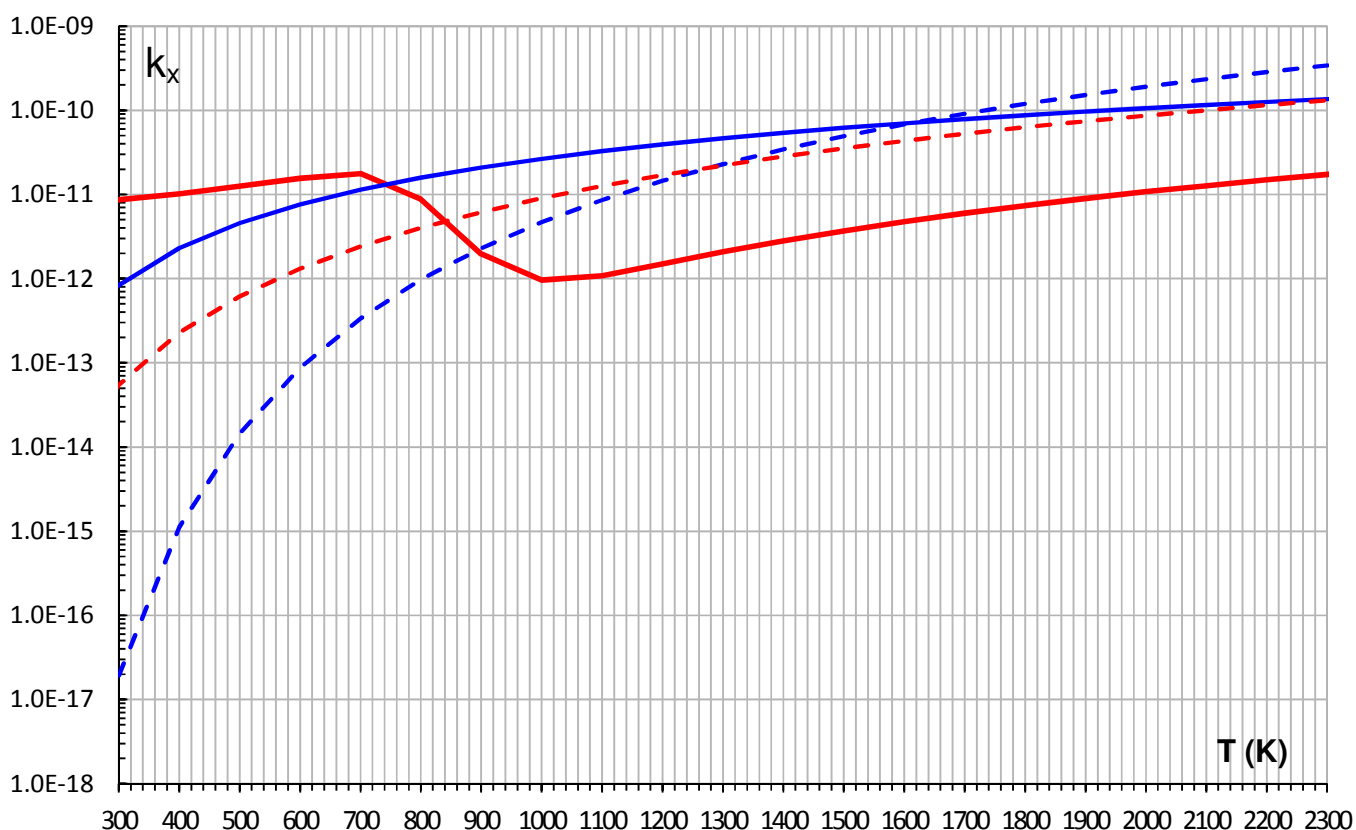

**FIGURE S2.** Rate constants  $k_x$  ( $\text{molecule}^{-1} \text{cm}^3 \text{s}^{-1}$ ) as a function of T. Red lines:  $X = \text{HO}$ ; blue lines:  $X = \text{O}$ .  $k_x$  “effective” (see main text) for X addition to naphthalene (continuous lines) vs H-abstraction from its position 1 (broken lines). A crossing occurs for HO just around 850 K, and a similar crossing for O at ca. 1600 K. Individual H abstractions can prevail over addition by O above 1640, 2000, or 2300 K.

We attempt now an analysis of the features exhibited by the four curves.

### Addition of HO on naphthalene.

The sum of the exit channels from the adduct (H abstractions: dotted gray curve) is coincident with  $k_{\text{O}}[\text{O}]$  (blue) in the approximate range 400 – 750 K; then coincident with C–H homolysis (black,  $k_{\text{-H}}$ ) in the range 1060 – 1200 K. Beyond 750 K,  $k_{-1}$  (purple) prevails on all other  $k$ 's.

In the approximate range 400 – 750 K the sum of the exit channels (dotted gray curve) prevails on  $k_{-1}$  (purple): as a consequence  $k_{\text{eff}}$  (plotted as a red continuous line in Figure S2) is dominated by  $k_1$  within that range (less so getting closer to the upper limit), and its ascending behavior is similar to that of the other curves.

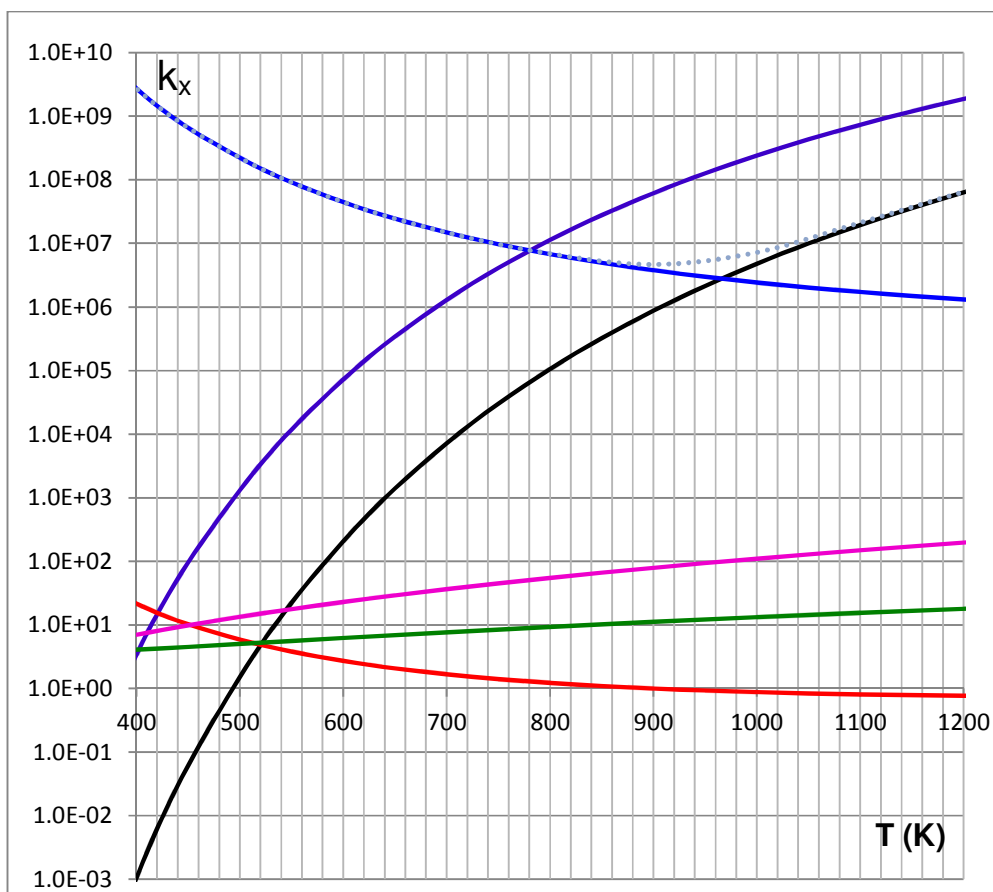

**FIGURE S3.** Hydroxyl addition to naphthalene. Rate constants as functions of T. Color code:

1. dotted gray:  $\sum k_i$  for all H-abstraction exit channels 4-7.
2. green:  $k_1$  for adduct formation from the two reactants.
3. purple:  $k_{-1}$  for the backwards step from the adduct to reactants.
4. black:  $k_{\text{-H}}$  for sheer C-H homolysis.
5. red:  $k_{\text{HO}}$  for H abstraction from the adduct carried out by hydroxyl.
6. blue:  $k_{\text{O}}$  for H abstraction from the adduct carried out by the oxygen atom.
7. magenta:  $k_{\text{O}_2}$  for H abstraction from the adduct carried out by dioxygen.

But the importance of  $k_{-1}$  grows with  $T$ , while, by contrast, the role of the sum of the exit channels declines. Hence the red continuous line of [Figure S2](#) ( $k_{\text{eff}}$  for addition) does not ascend too steeply, and at ca. 700 K begins to decline.

Within a transition zone, approximately 750-1050 K, the sum of the exit channels sees a minimum. Considering that it damps the effect of  $k_{-1}$ , its role goes also through a minimum, and the overall addition rate (red continuous line of [Figure S2](#),  $k_{\text{eff}}$ ) declines.

However, the slope of the sum of the exit channels (dotted gray) becomes again positive. The pure homolysis ( $k_{-H}$ ) and the backwards step from the adduct to reactants ( $k_{-1}$ ), black and purple lines, respectively, have a similar dependence on  $T$  dictated by their common trait: cleavage of one bond, and consequent entropy effect related to the step from one species to two. However, they show also a somewhat converging behavior: they are separated by more than three orders of magnitude at  $T=400$  K, but only by somewhat more than one at  $T = 1200$  K. Therefore, H loss by sheer homolysis ( $k_{-H}$ ), chiefly, among the exit channels, thwarts to some extent  $k_{-1}$ , and the value of  $k_{\text{eff}}$  grows again beyond  $T = 1000$  K ([Figure S2](#)).

### Addition of O on naphthalene.

The main feature is that the sum of exit channels from the adduct (H abstractions, gray dotted line in Figure S4) is coincident with C–H homolysis (black line,  $k_{-H}$ ) in the whole range 400 – 1200 K. It also prevails on  $k_{-1}$  (purple line) at all temperatures represented. As a consequence  $k_{\text{eff}}$  (Figure S2, blue continuous line) is dominated by  $k_1$  within the whole range 400 – 1200 K.

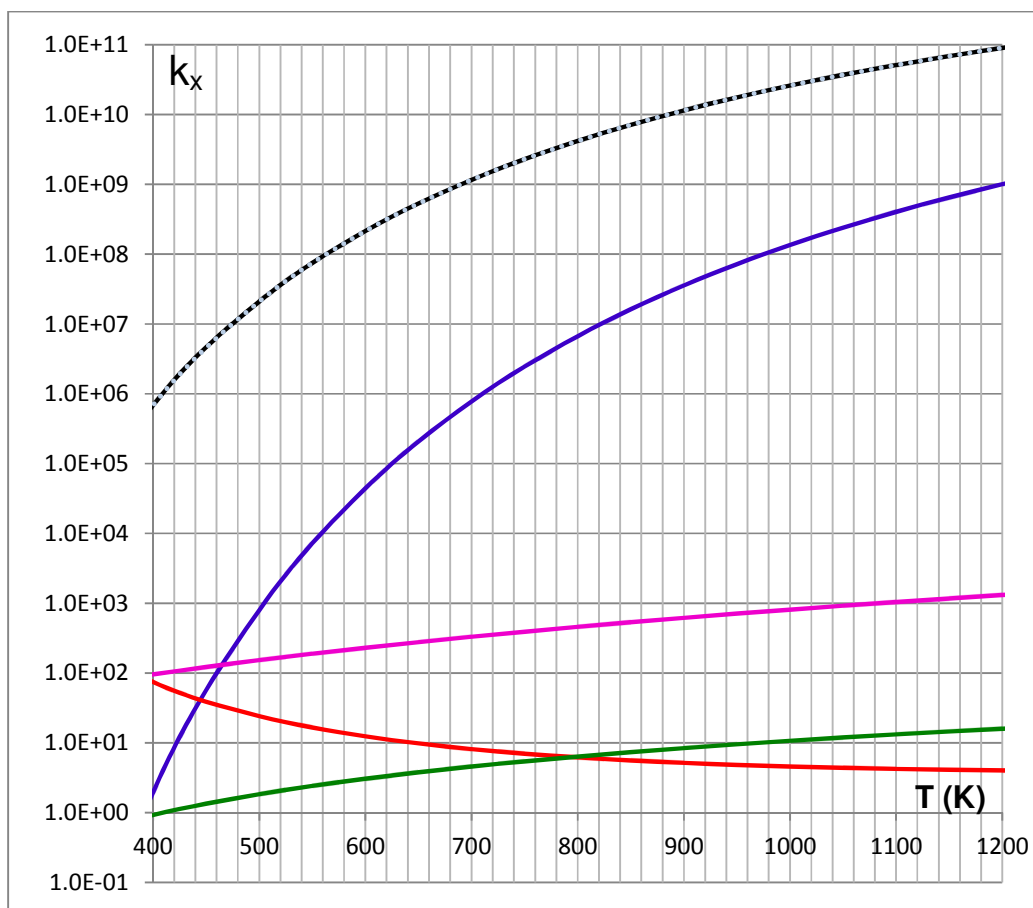

**FIGURE S4.** Hydroxyl addition to naphthalene. Rate constants  $k_{\text{HO}}$  as a function of T.

1. dotted gray:  $\sum k_i$  for all H-abstraction exit channels 4-7.
2. green:  $k_1$  for adduct formation from the two reactants.
3. purple:  $k_{-1}$  for the backwards step from the adduct to reactants.
4. black:  $k_{-H}$  for sheer C-H homolysis.
5. red:  $k_{\text{HO}}$  for H abstraction from the adduct carried out by hydroxyl.
6. Magenta:  $k_{\text{O}_2}$  for H abstraction from the adduct carried out by dioxygen.

## Section 6.

### Kinetic simulations.

Hypothesizing three O concentrations,  $10^{12}$  (Figure S5),  $10^{14}$  (Figure S6), and  $10^{16}$  (Figure S7) atoms  $\text{cm}^{-3}$ , we carried out three kinetic simulations. Other species concentrations were kept constant:  $[\text{OH}] = 1 \cdot 10^{12}$  molec.  $\text{cm}^{-3}$ ,  $[\text{H}] = 1 \cdot 10^{12}$  molec.  $\text{cm}^{-3}$ ,  $[\text{O}_2] = 1 \cdot 10^{17}$  molec.  $\text{cm}^{-3}$ . The amount of naphthol **2** produced by pathways **0-1-3-2** and **0-4-2**, as a function of time is plotted.

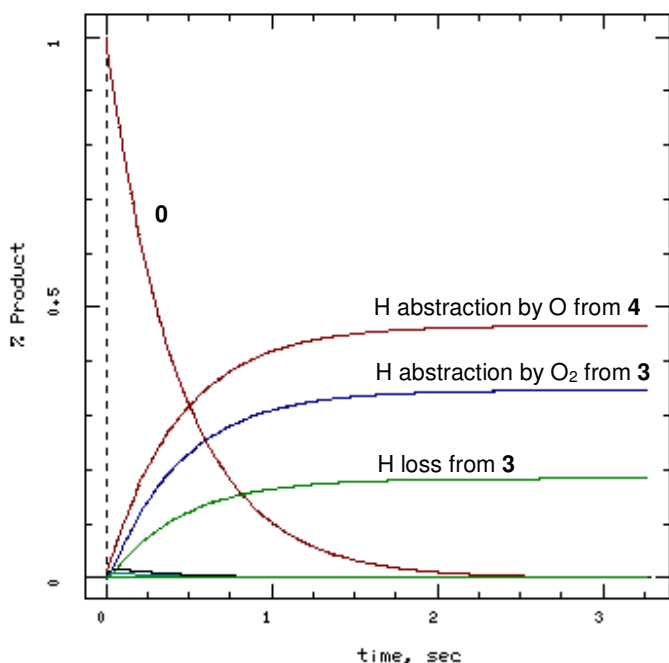

**Figure S5.** Kinetic simulation of reactions in Scheme 1. Yield vs time, by using  $[\text{OH}] = 1 \cdot 10^{12}$  molec.  $\text{cm}^{-3}$ ,  $[\text{H}] = 1 \cdot 10^{12}$  molec.  $\text{cm}^{-3}$ ,  $[\text{O}_2] = 1 \cdot 10^{17}$  molec.  $\text{cm}^{-3}$ , and  $[\text{O}] = 1 \cdot 10^{12}$  molec.  $\text{cm}^{-3}$ .

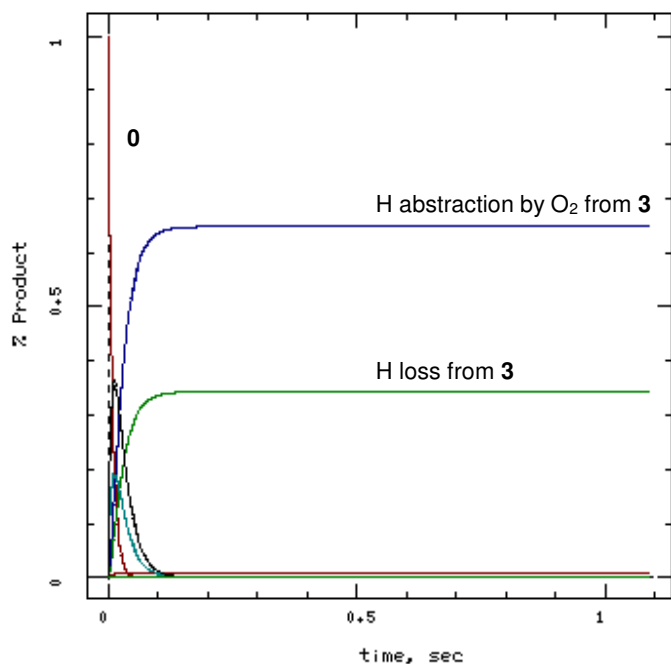

**Figure S6.** Kinetic simulation of reactions in Scheme 1. Yield vs time, by using  $[\text{OH}] = 1 \cdot 10^{12}$  molec.  $\text{cm}^{-3}$ ,  $[\text{H}] = 1 \cdot 10^{12}$  molec.  $\text{cm}^{-3}$ ,  $[\text{O}_2] = 1 \cdot 10^{17}$  molec.  $\text{cm}^{-3}$ , and  $[\text{O}] = 1 \cdot 10^{14}$  molec.  $\text{cm}^{-3}$ .

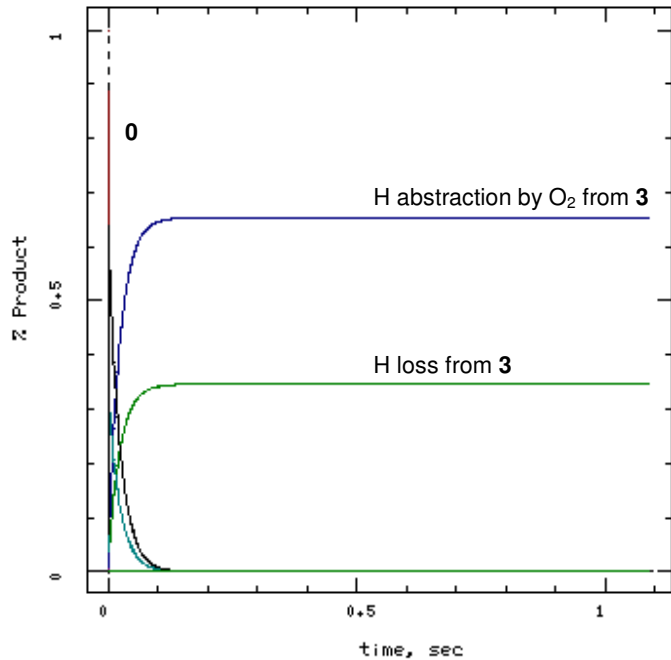

**Figure S7.** Kinetic simulation of reactions in Scheme 1. Yield vs time, by using  $[\text{OH}] = 1 \cdot 10^{12}$  molec.  $\text{cm}^{-3}$ ,  $[\text{H}] = 1 \cdot 10^{12}$  molec.  $\text{cm}^{-3}$ ,  $[\text{O}_2] = 1 \cdot 10^{17}$  molec.  $\text{cm}^{-3}$ , and  $[\text{O}] = 1 \cdot 10^{16}$  molec.  $\text{cm}^{-3}$ .

## Section 7

### Table of energies.

**Table S3.** Energies and Free Energies contribution at 400 K, in Hartrees.

|                                                        | M06-2X/6-311G (d, p) |                         | M06-2X/cc-pvTz//M06-2X/<br>6-311G (d, p) |                            |
|--------------------------------------------------------|----------------------|-------------------------|------------------------------------------|----------------------------|
|                                                        | E /h                 | dG (400 K) <sup>a</sup> | E /h                                     | E (Yamaguchi) <sup>b</sup> |
| Naphthalene                                            | -385.811857          | 0.104490                | -385.8551335                             |                            |
| O( <sup>3</sup> P)                                     | -75.057682           | -0.020991               | -75.06424175                             |                            |
| <sup>3</sup> O <sub>2</sub>                            | -150.303973          | -0.023998               | -75.06424175                             |                            |
| HO                                                     | -75.720592           | -0.015421               | -75.73046559                             |                            |
| H <sub>2</sub> O                                       | -76.412327           | -0.003485               | -76.42524901                             |                            |
| HOO                                                    | -150.884668          | -0.016524               | -150.9041754                             |                            |
| H                                                      | 0.498134             | -0.015224               | -0.498134772                             |                            |
| TS 0-1                                                 | -460.866971          | 0.098132                | -460.9177528                             |                            |
| 1                                                      | -460.904033          | 0.098336                | -460.9545195                             |                            |
| TS 1- <sup>3</sup> 2                                   | -460.854989          | 0.093470                | -460.9079429                             |                            |
| <sup>3</sup> 2                                         | -460.926181          | 0.097028                | -460.9794962                             |                            |
| TS 1-3 (H loss)                                        | -460.876666          | 0.092101                | -460.9276107                             |                            |
| TS 1-3 (H-abstraction by <sup>3</sup> O <sub>2</sub> ) | -611.206572          | 0.095830                | -611.2739212                             |                            |
| TS 1-3 (H-abstraction by OH)                           | -536.63526*          | 0.103609                | -536.693962*                             | -536.695606                |
| 3                                                      | -460.395224          | 0.091088                | -460.4462003                             |                            |
| TS 3- <sup>1</sup> 2                                   | -460.89287*          | 0.091743                | -460.943960*                             | -460.948501                |
| <sup>1</sup> 2                                         | -461.034247          | 0.105028                | -461.086946                              |                            |
| TS 3-ketone                                            | -460.892905*         | 0.087598                | -460.943787*                             | -460.944649                |
| ketone                                                 | -461.019251          | 0.103344                | -461.0698945                             |                            |
| TS 0-4                                                 | -461.535824          | 0.108202                | -461.5883389                             |                            |

|                                                        |              |          |              |             |
|--------------------------------------------------------|--------------|----------|--------------|-------------|
| 4                                                      | -461.574403  | 0.110883 | -461.6271275 |             |
| TS 4-1 <sup>2</sup> (H loss)                           | -461.522561  | 0.105244 | -461.5751692 |             |
| TS 4-1 <sup>2</sup> (H-abstraction by O <sub>2</sub> ) | -611.863862* | 0.106954 | -611.932787* | -611.944344 |
| TS 4-1 <sup>2</sup> (H-abstraction by O)               | -536.643729* | 0.107441 | -536.701624* | -536.708359 |
| TS 4-1 <sup>2</sup> (H-abstraction by OH)              | -537.309045* | 0.118616 | -537.369220* | -537.373684 |
| 10                                                     | -535.555026  | 0.091930 | -535.6133388 |             |
| TS 10-11 (H loss)                                      | -685.849536* | 0.086205 | -685.924618* | -685.938806 |
| TS 10-11 (H-abstraction by O <sub>2</sub> )            | -535.518936  | 0.083265 | -535.5783187 |             |
| TS 10-11 (H-abstraction by OH)                         | -611.284329* | 0.083265 | -611.351425* | -611.355754 |
| 11                                                     | -535.032520  | 0.084143 | -535.0913612 |             |
| TS 1-6                                                 | -846.695906  | 0.229926 | -846.7858503 |             |
| 6                                                      | -846.713381  | 0.233170 | -846.8021786 |             |
| TS 1-7                                                 | -846.712281  | 0.229640 | -846.8040739 |             |
| 7                                                      | -846.739614  | 0.229469 | -846.8325525 |             |
| TS 7-8 (H loss)                                        | -846.683606  | 0.224357 | -846.776843  |             |
| TS 7-8 (H-abstraction by O <sub>2</sub> )              | -997.035742* | 0.233335 | -997.145005* | -997.164564 |
| TS 7-8 (H-abstraction by OH)                           | -922.470442* | 0.237763 | -922.571268* | -922.572549 |
| "TS" 1-8 (Maximum of the Free Energy)                  | -846.033988* | 0.210561 | -846.126466* | -846.126625 |
| TS 2-8                                                 | -846.175383  | 0.220736 | -846.2685643 |             |
| 5                                                      | -385.125532  | 0.089007 | -385.1686143 |             |
| TS 2-9                                                 | -845.528741* | 0.207049 | -845.620976* | -845.626459 |
| 8                                                      | -846.194466  | 0.223744 | -846.2877467 |             |
| TS 8-9 (H-abstraction by O)                            | -921.244568* | 0.241213 | -921.364426* | -921.370661 |
| TS 8-9 (H loss)                                        | -846.118979  | 0.216167 | -846.2330438 |             |
| TS 8-9 (H-abstraction by O <sub>2</sub> )              | -996.460101* | 0.218529 | -996.592702* | -996.603752 |
| TS 8-9 (H-abstraction by OH)                           | -921.904942* | 0.230980 | -922.033474* | -922.044186 |
| 9                                                      | -845.650593  | 0.216222 | -845.7444963 |             |
| TS naphthalene+O (H-abstraction by O)                  | -460.847796  | 0.089706 | -460.8987116 |             |



TS naphthalene+OH (H-abstraction by OH)

-461.526073

0.102401

-461.5786021

**\*Without Yamaguchi's correction**

<sup>a</sup> Free energy correction at 400K:  $G(T) = E + dG(T)$ . <sup>b</sup> Energy values were spin-corrected by Yamaguchi's formula. For singlet diradicaloid structures, the wavefunctions were spin-mixed for better description of the electron distribution, but the energy had to be refined by Yamaguchi's formula. See the Theoretical Method section for details.

## Section 8

Emission spectra for the discharge in He with residual traces of H<sub>2</sub>O

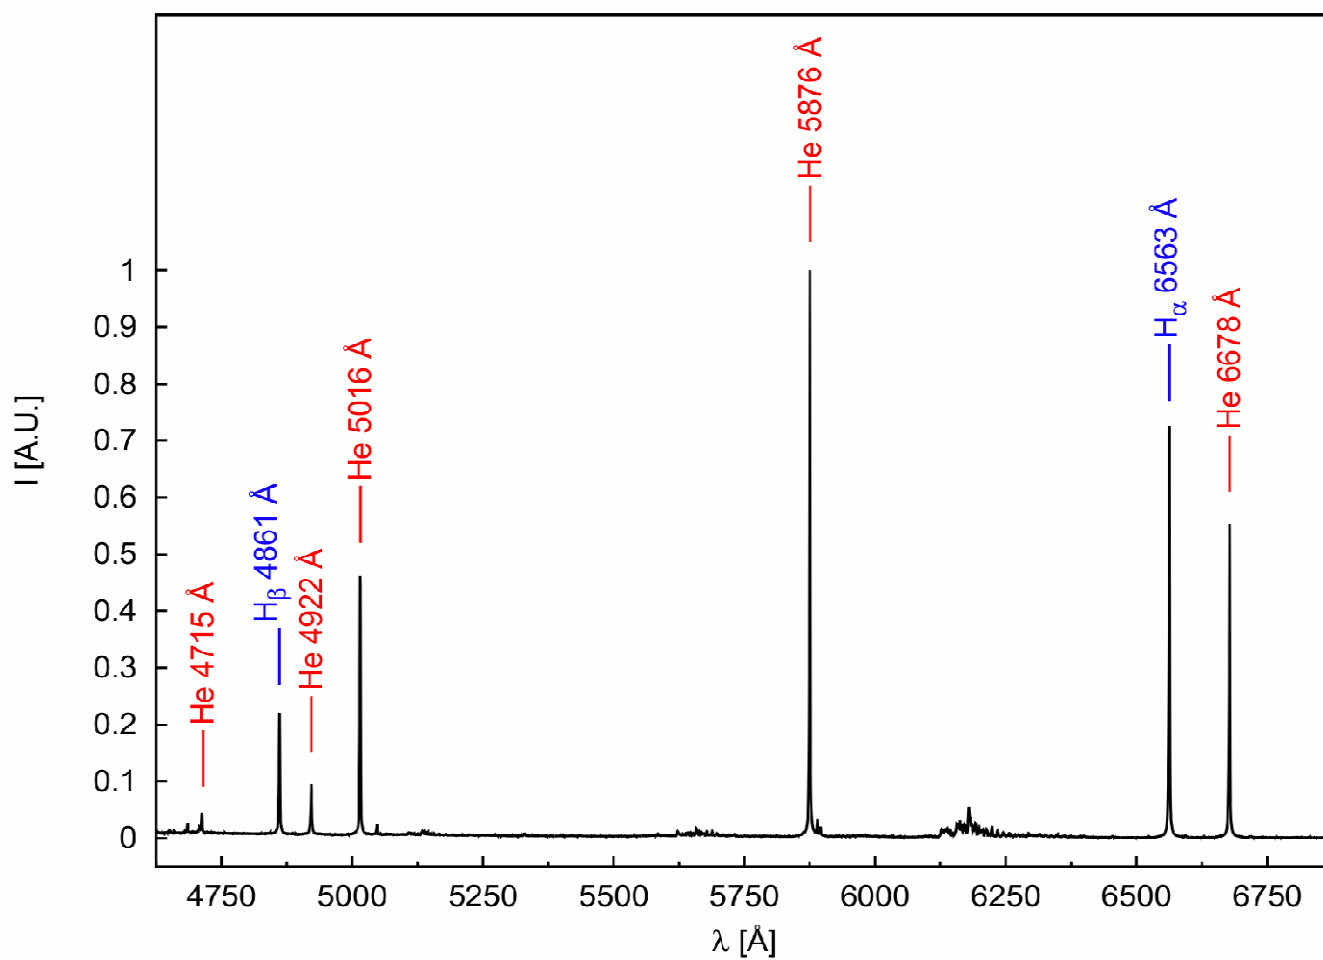

Figure S8. emission from H

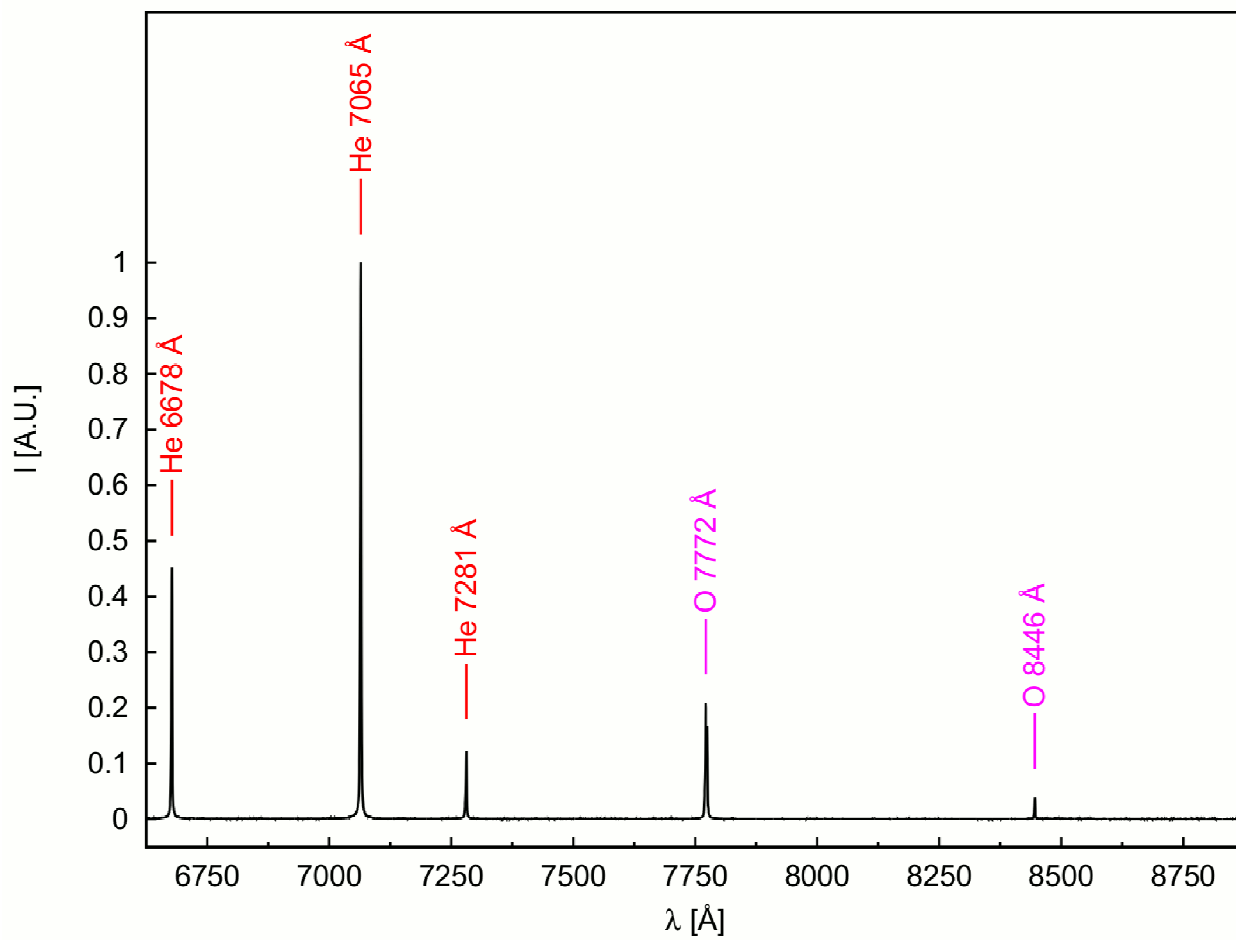

**Figure S9.** Emission from O

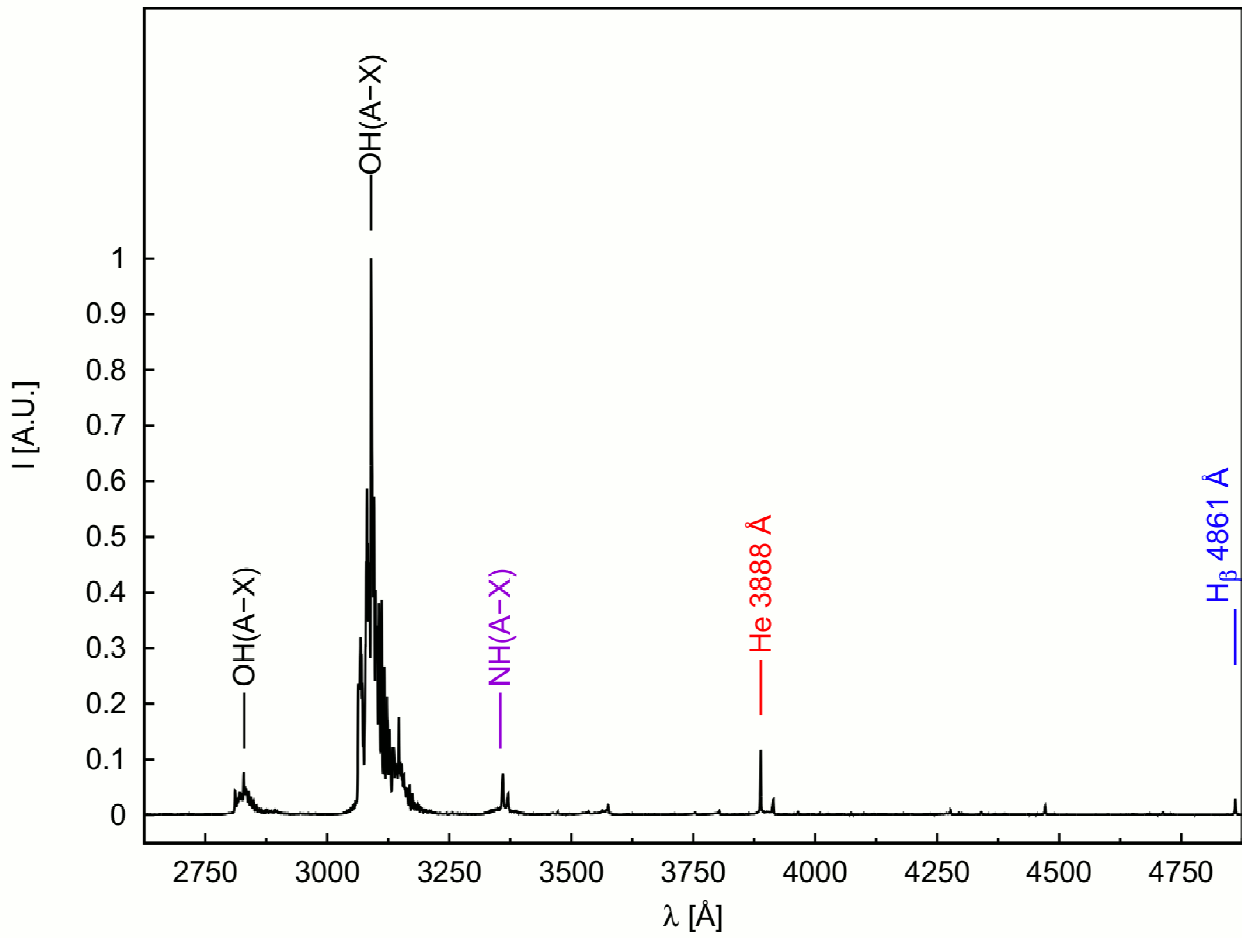

**Figure S10.** Emission from OH

## Section 9. Geometries

### Naphthalene

| Atom | X        | Y       | Z        | (Angstrom) |
|------|----------|---------|----------|------------|
| 6    | -0.00920 | 0.00000 | 0.00531  |            |
| 6    | 0.01644  | 0.00000 | 1.42321  |            |
| 6    | 1.20490  | 0.00000 | 2.10175  |            |
| 6    | 2.43016  | 0.00000 | 1.39435  |            |
| 6    | 2.43675  | 0.00000 | 0.02584  |            |
| 1    | -0.92545 | 0.00000 | 1.96106  |            |
| 1    | 1.21203  | 0.00000 | 3.18502  |            |
| 1    | 3.36473  | 0.00000 | 1.94216  |            |
| 1    | 3.37349  | 0.00000 | -0.52093 |            |
| 6    | -1.22431 | 0.00000 | -0.72584 |            |
| 6    | -1.21772 | 0.00000 | -2.09435 |            |
| 6    | 0.00754  | 0.00000 | -2.80175 |            |
| 6    | 1.19600  | 0.00000 | -2.12321 |            |
| 6    | 1.22164  | 0.00000 | -0.70531 |            |
| 1    | -2.16106 | 0.00000 | -0.17907 |            |
| 1    | -2.15230 | 0.00000 | -2.64216 |            |
| 1    | 0.00040  | 0.00000 | -3.88502 |            |
| 1    | 2.13788  | 0.00000 | -2.66106 |            |

E= -385.811857 (Hartree)

### O (<sup>3</sup>P)

| Atom | X       | Y       | Z       | (Angstrom) |
|------|---------|---------|---------|------------|
| 8    | 0.00000 | 0.00000 | 0.00000 |            |

E= -75.057682 (Hartree)

### TS 0-1

| Atom | X        | Y        | Z        | (Angstrom) |
|------|----------|----------|----------|------------|
| 6    | 0.01043  | 0.01030  | 0.01874  |            |
| 6    | 0.00717  | -0.00504 | 1.43393  |            |
| 6    | 1.24357  | 0.00295  | 2.11984  |            |
| 6    | 2.42838  | 0.01628  | 1.42573  |            |
| 6    | 2.42610  | 0.01779  | 0.01709  |            |
| 6    | 1.23609  | 0.00999  | -0.67269 |            |
| 6    | -1.24805 | -0.04917 | -0.68577 |            |
| 6    | -2.44197 | 0.05614  | 0.03911  |            |
| 6    | -2.42861 | 0.03422  | 1.44044  |            |
| 6    | -1.23792 | -0.00271 | 2.12590  |            |
| 1    | 1.24068  | -0.00464 | 3.20435  |            |
| 1    | 3.37048  | 0.02114  | 1.96064  |            |
| 1    | 3.36605  | 0.01926  | -0.52142 |            |
| 1    | 1.22467  | -0.00458 | -1.75690 |            |
| 1    | -1.22804 | -0.01681 | 3.21019  |            |
| 1    | -3.36514 | 0.06168  | 1.98392  |            |
| 1    | -3.38374 | 0.10319  | -0.49330 |            |
| 1    | -1.24563 | 0.16332  | -1.74741 |            |
| 8    | -1.18687 | -1.96382 | -0.94924 |            |

E= -460.866971 (Hartree)

**1**

| Atom | X        | Y        | Z        | (Angstrom) |
|------|----------|----------|----------|------------|
| 6    | 0.01645  | 0.01501  | 0.01426  |            |
| 6    | 0.01050  | 0.05841  | 1.42330  |            |
| 6    | 1.24373  | 0.05335  | 2.10212  |            |
| 6    | 2.43603  | -0.00053 | 1.40570  |            |
| 6    | 2.42823  | -0.05872 | 0.01052  |            |
| 6    | 1.22027  | -0.05291 | -0.67468 |            |
| 6    | -1.28776 | 0.04151  | -0.76451 |            |
| 6    | -2.51729 | -0.06933 | 0.08917  |            |
| 6    | -2.45541 | -0.03581 | 1.45271  |            |
| 6    | -1.23457 | 0.06440  | 2.13637  |            |
| 8    | -1.30817 | -0.83149 | -1.82959 |            |
| 1    | 1.24329  | 0.08262  | 3.18641  |            |
| 1    | 3.37650  | -0.00504 | 1.94348  |            |
| 1    | 3.36174  | -0.11111 | -0.53627 |            |
| 1    | 1.20000  | -0.11569 | -1.75701 |            |
| 1    | -1.21561 | 0.09471  | 3.21866  |            |
| 1    | -3.37394 | -0.10167 | 2.02510  |            |
| 1    | -3.45629 | -0.17320 | -0.44003 |            |
| 1    | -1.33596 | 1.02243  | -1.30036 |            |

E= -460.904033 (Hartree)

**TS 1-32**

| Atom | X        | Y        | Z        | (Angstrom) |
|------|----------|----------|----------|------------|
| 6    | 0.01300  | 0.03638  | 0.00188  |            |
| 6    | 0.00535  | 0.01184  | 1.43803  |            |
| 6    | 1.23432  | -0.06363 | 2.14448  |            |
| 6    | 2.50351  | -0.03718 | 1.37824  |            |
| 6    | 2.42605  | -0.16200 | -0.10089 |            |
| 6    | 1.23250  | -0.11468 | -0.72932 |            |
| 6    | -1.18601 | 0.01026  | 2.16891  |            |
| 6    | -1.17221 | -0.06857 | 3.56176  |            |
| 6    | 0.03178  | -0.16237 | 4.23888  |            |
| 6    | 1.23684  | -0.16276 | 3.52283  |            |
| 8    | 3.65781  | -0.46797 | 1.99699  |            |
| 1    | -2.12977 | 0.05411  | 1.63602  |            |
| 1    | -2.10729 | -0.06609 | 4.10893  |            |
| 1    | 0.04726  | -0.23605 | 5.31926  |            |
| 1    | 2.18675  | -0.24249 | 4.03804  |            |
| 1    | -0.92968 | 0.10729  | -0.52543 |            |
| 1    | 1.18707  | -0.19295 | -1.80938 |            |
| 1    | 3.36281  | -0.27983 | -0.63030 |            |
| 1    | 3.44047  | 0.71729  | 1.81526  |            |

E= -460.854989 (Hartree)

**32**

| Atom | X        | Y       | Z       | (Angstrom) |
|------|----------|---------|---------|------------|
| 6    | -0.00524 | 0.00000 | 0.01830 |            |
| 6    | 0.01806  | 0.00000 | 1.41177 |            |
| 6    | 1.25229  | 0.00000 | 2.13005 |            |

|   |          |         |          |
|---|----------|---------|----------|
| 6 | 2.43144  | 0.00000 | 1.44843  |
| 6 | 2.44317  | 0.00000 | 0.01738  |
| 1 | -0.92140 | 0.00000 | 1.95238  |
| 1 | 1.23820  | 0.00000 | 3.21279  |
| 1 | 3.37473  | 0.00000 | 1.98127  |
| 1 | 3.38204  | 0.00000 | -0.51981 |
| 6 | -1.21387 | 0.00000 | -0.71979 |
| 6 | -1.22017 | 0.00000 | -2.16773 |
| 6 | -0.05262 | 0.00000 | -2.84239 |
| 6 | 1.19993  | 0.00000 | -2.11370 |
| 6 | 1.25074  | 0.00000 | -0.69432 |
| 1 | -2.15463 | 0.00000 | -0.18351 |
| 1 | -2.16514 | 0.00000 | -2.69529 |
| 1 | -0.02735 | 0.00000 | -3.92770 |
| 8 | 2.37961  | 0.00000 | -2.77482 |
| 1 | 2.22275  | 0.00000 | -3.72283 |

E= -460.926181 (Hartree)

**TS 1-3 (H loss)**

| Atom | X        | Y        | Z        | (Angstrom) |
|------|----------|----------|----------|------------|
| 6    | 0.00321  | 0.04898  | 0.01484  |            |
| 6    | 0.00283  | 0.03760  | 1.42579  |            |
| 6    | 1.23786  | 0.00074  | 2.10234  |            |
| 6    | 2.42296  | -0.02782 | 1.39590  |            |
| 6    | 2.40899  | -0.02290 | -0.00449 |            |
| 6    | 1.20500  | 0.01759  | -0.68771 |            |
| 6    | -1.29104 | 0.11479  | -0.72232 |            |
| 6    | -2.50481 | -0.02548 | 0.07656  |            |
| 6    | -2.45684 | -0.04063 | 1.45267  |            |
| 6    | -1.24184 | 0.02664  | 2.13244  |            |
| 8    | -1.33116 | -0.09080 | -1.97221 |            |
| 1    | 1.24335  | -0.01141 | 3.18689  |            |
| 1    | 3.36722  | -0.05727 | 1.92635  |            |
| 1    | 3.34281  | -0.05003 | -0.55275 |            |
| 1    | 1.16902  | 0.02658  | -1.77061 |            |
| 1    | -1.22378 | 0.02483  | 3.21603  |            |
| 1    | -3.37752 | -0.11944 | 2.01896  |            |
| 1    | -3.43560 | -0.08555 | -0.47288 |            |
| 1    | -1.26423 | 1.73356  | -0.95850 |            |

E= -460.876666 (Hartree)

**TS 1-3 (H-abstraction by <sup>3</sup>O<sub>2</sub>)**

| Atom | X        | Y        | Z        | (Angstrom) |
|------|----------|----------|----------|------------|
| 6    | -0.05940 | 0.07478  | 0.09745  |            |
| 6    | -0.03685 | 0.16642  | 1.48108  |            |
| 6    | 1.18049  | 0.13888  | 2.16756  |            |
| 6    | 2.36658  | 0.03302  | 1.46758  |            |
| 6    | 2.36367  | -0.05523 | 0.06387  |            |
| 6    | 1.12944  | -0.04217 | -0.61485 |            |
| 6    | 1.10510  | -0.19684 | -2.11300 |            |
| 6    | 2.41222  | -0.07635 | -2.79211 |            |
| 6    | 3.59554  | -0.05644 | -2.06927 |            |
| 6    | 3.58973  | -0.09438 | -0.68741 |            |

|   |          |          |          |
|---|----------|----------|----------|
| 8 | 0.06217  | 0.32928  | -2.76002 |
| 1 | 2.39350  | 0.04591  | -3.86691 |
| 1 | 4.53857  | 0.00332  | -2.59937 |
| 1 | 4.52566  | -0.09189 | -0.14055 |
| 1 | 3.31554  | 0.02554  | 1.99273  |
| 1 | 1.19378  | 0.20748  | 3.24854  |
| 1 | -0.96520 | 0.25906  | 2.03159  |
| 1 | -0.99419 | 0.09986  | -0.44996 |
| 1 | 0.86319  | -1.36837 | -2.26620 |
| 8 | 1.29141  | -2.80138 | -2.82619 |
| 8 | 2.34360  | -2.55729 | -3.37918 |

E= -611.206572 (Hartree)

**TS 1-3 (H-abstraction by OH)**

| Atom | X        | Y        | Z        | (Angstrom) |
|------|----------|----------|----------|------------|
| 6    | 0.06747  | 0.09332  | 0.02363  |            |
| 6    | 0.09386  | 0.08307  | 1.45947  |            |
| 6    | 1.32446  | -0.02338 | 2.13971  |            |
| 6    | 2.63221  | -0.00400 | 1.36666  |            |
| 6    | 2.47103  | -0.14716 | -0.11657 |            |
| 6    | 1.24649  | -0.06686 | -0.71734 |            |
| 6    | 1.35388  | -0.08923 | 3.52761  |            |
| 6    | 0.17520  | -0.02812 | 4.26217  |            |
| 6    | -1.04947 | 0.09350  | 3.60099  |            |
| 6    | -1.08971 | 0.14211  | 2.21929  |            |
| 8    | 3.59692  | -0.82176 | 1.88261  |            |
| 8    | 2.23495  | 2.72746  | 2.41991  |            |
| 1    | 3.38213  | -0.29205 | -0.68302 |            |
| 1    | 1.18190  | -0.13913 | -1.79718 |            |
| 1    | -0.88864 | 0.16975  | -0.47919 |            |
| 1    | -2.03992 | 0.22137  | 1.70202  |            |
| 1    | -1.97010 | 0.14144  | 4.17023  |            |
| 1    | 0.20727  | -0.07685 | 5.34373  |            |
| 1    | 2.31333  | -0.18729 | 4.02294  |            |
| 1    | 3.08924  | 1.01261  | 1.55099  |            |
| 1    | 1.39944  | 2.45256  | 2.83605  |            |

E= -536.635260 (Hartree)

**<sup>3</sup>O<sub>2</sub>**

| Atom | X       | Y       | Z       | (Angstrom) |
|------|---------|---------|---------|------------|
| 8    | 0.00000 | 0.00000 | 0.00000 |            |
| 8    | 0.00000 | 0.00000 | 1.18851 |            |

E= -150.303973 (Hartree)

**OH**

| Atom | X       | Y       | Z       | (Angstrom) |
|------|---------|---------|---------|------------|
| 8    | 0.00000 | 0.00000 | 0.01431 |            |
| 1    | 0.00000 | 0.00000 | 0.98569 |            |

E= -75.720592 (Hartree)

**HOO**

| Atom | X       | Y       | Z       | (Angstrom) |
|------|---------|---------|---------|------------|
| 8    | 0.00000 | 0.00000 | 0.00000 |            |



|   |         |         |         |
|---|---------|---------|---------|
| 8 | 0.00000 | 0.00000 | 1.30728 |
| 1 | 0.93406 | 0.00000 | 1.57577 |

E= -150.884668 (Hartree)

**H<sub>2</sub>O**

| Atom | X       | Y       | Z        | (Angstrom) |
|------|---------|---------|----------|------------|
| 8    | 0.01031 | 0.00000 | 0.00791  |            |
| 1    | 0.01740 | 0.00000 | 0.96665  |            |
| 1    | 0.93821 | 0.00000 | -0.23338 |            |

E= -76.412327 (Hartree)

**H**

E= 0.498134 (Hartree)

**3**

| Atom | X        | Y       | Z        | (Angstrom) |
|------|----------|---------|----------|------------|
| 6    | 0.00929  | 0.00000 | 0.01337  |            |
| 6    | 0.01874  | 0.00000 | 1.42336  |            |
| 6    | 1.21284  | 0.00000 | 2.11277  |            |
| 6    | 2.43009  | 0.00000 | 1.41695  |            |
| 6    | 2.44138  | 0.00000 | 0.03331  |            |
| 1    | -0.92499 | 0.00000 | 1.95793  |            |
| 1    | 1.21220  | 0.00000 | 3.19613  |            |
| 1    | 3.36396  | 0.00000 | 1.96596  |            |
| 1    | 3.36722  | 0.00000 | -0.52929 |            |
| 6    | -1.21180 | 0.00000 | -0.72697 |            |
| 6    | -1.21248 | 0.00000 | -2.11993 |            |
| 6    | -0.02831 | 0.00000 | -2.82815 |            |
| 6    | 1.26099  | 0.00000 | -2.15920 |            |
| 6    | 1.24102  | 0.00000 | -0.67787 |            |
| 1    | -2.14909 | 0.00000 | -0.18216 |            |
| 1    | -2.15766 | 0.00000 | -2.64983 |            |
| 1    | -0.00789 | 0.00000 | -3.91104 |            |
| 8    | 2.31574  | 0.00000 | -2.79083 |            |

E= -460.395224 (Hartree)

**TS 3<sup>-1</sup>2**

| Atom | X        | Y        | Z        | (Angstrom) |
|------|----------|----------|----------|------------|
| 6    | -0.12228 | 0.01654  | 0.00502  |            |
| 6    | -0.05372 | 0.01338  | 1.41666  |            |
| 6    | 1.21151  | -0.03410 | 2.03792  |            |
| 6    | 2.35984  | -0.08310 | 1.27722  |            |
| 6    | 2.28081  | -0.08360 | -0.12355 |            |
| 6    | 1.05040  | -0.03111 | -0.75275 |            |
| 6    | -1.43094 | 0.05027  | -0.66645 |            |
| 6    | -2.60238 | 0.05819  | 0.17216  |            |
| 6    | -2.50327 | 0.07556  | 1.55287  |            |
| 6    | -1.26149 | 0.05167  | 2.17558  |            |
| 8    | -1.51886 | 0.06397  | -1.90546 |            |
| 1    | 1.26754  | -0.03526 | 3.12110  |            |
| 1    | 3.32803  | -0.12187 | 1.76194  |            |
| 1    | 3.18940  | -0.12230 | -0.71221 |            |
| 1    | 0.96470  | -0.01911 | -1.83287 |            |

|   |          |          |          |
|---|----------|----------|----------|
| 1 | -1.19528 | 0.05751  | 3.25783  |
| 1 | -3.40268 | 0.09920  | 2.15656  |
| 1 | -3.56006 | 0.06803  | -0.33371 |
| 1 | -0.72829 | -1.65687 | -2.67706 |

E= -460.892870 (Hartree)

## 12

| Atom | X        | Y       | X        | (Angstrom) |
|------|----------|---------|----------|------------|
| 6    | -0.03578 | 0.00000 | 0.01133  |            |
| 6    | -0.02370 | 0.00000 | 1.43008  |            |
| 6    | 1.23053  | 0.00000 | 2.09264  |            |
| 6    | 2.40115  | 0.00000 | 1.38249  |            |
| 6    | 2.37945  | 0.00000 | -0.03117 |            |
| 6    | 1.18641  | 0.00000 | -0.70408 |            |
| 6    | -1.29377 | 0.00000 | -0.65841 |            |
| 6    | -2.46594 | 0.00000 | 0.05208  |            |
| 6    | -2.43805 | 0.00000 | 1.46576  |            |
| 6    | -1.25123 | 0.00000 | 2.14383  |            |
| 8    | -1.24708 | 0.00000 | -2.01753 |            |
| 1    | 1.24388  | 0.00000 | 3.17720  |            |
| 1    | 3.35156  | 0.00000 | 1.90287  |            |
| 1    | 3.31223  | 0.00000 | -0.58199 |            |
| 1    | 1.15387  | 0.00000 | -1.78596 |            |
| 1    | -1.22911 | 0.00000 | 3.22735  |            |
| 1    | -3.37620 | 0.00000 | 2.00749  |            |
| 1    | -3.41707 | 0.00000 | -0.47034 |            |
| 1    | -2.14325 | 0.00000 | -2.36367 |            |

E= -461.034247 (Hartree)

## TS 3-ketone

| Atom | X        | Y        | X        | (Angstrom) |
|------|----------|----------|----------|------------|
| 6    | 0.09186  | 0.15441  | 0.10063  |            |
| 6    | 0.04209  | 0.11329  | 1.52738  |            |
| 6    | 1.24656  | 0.04658  | 2.26208  |            |
| 6    | 2.54874  | 0.01968  | 1.55516  |            |
| 6    | 2.50262  | 0.06597  | 0.10365  |            |
| 6    | 1.30748  | 0.13037  | -0.58130 |            |
| 6    | -1.18253 | 0.13945  | 2.22530  |            |
| 6    | -1.20020 | 0.10023  | 3.60352  |            |
| 6    | 0.00108  | 0.03390  | 4.32350  |            |
| 6    | 1.21295  | 0.00744  | 3.65632  |            |
| 8    | 3.61382  | -0.03776 | 2.16570  |            |
| 1    | -2.10894 | 0.19017  | 1.66373  |            |
| 1    | -2.14524 | 0.12028  | 4.13274  |            |
| 1    | -0.02216 | 0.00346  | 5.40613  |            |
| 1    | 2.15528  | -0.04334 | 4.18837  |            |
| 1    | -0.83958 | 0.21284  | -0.45060 |            |
| 1    | 1.30818  | 0.16455  | -1.66442 |            |
| 1    | 3.45694  | 0.04749  | -0.40799 |            |
| 1    | -0.85338 | -2.97799 | -1.14005 |            |

E= -460.892905 (Hartree)

## ketone

| Atom | X        | Y        | Z        | (Angstrom) |
|------|----------|----------|----------|------------|
| 6    | 0.01112  | -0.00014 | 0.01139  |            |
| 6    | 0.01738  | -0.00028 | 1.40824  |            |
| 6    | 1.24394  | -0.00026 | 2.07610  |            |
| 6    | 2.43443  | -0.00011 | 1.36691  |            |
| 6    | 2.42182  | 0.00002  | -0.02915 |            |
| 6    | 1.21326  | 0.00001  | -0.70097 |            |
| 6    | -1.27019 | -0.00007 | -0.75533 |            |
| 6    | -2.51758 | -0.00020 | 0.03761  |            |
| 6    | -2.51127 | -0.00034 | 1.37051  |            |
| 6    | -1.26560 | -0.00050 | 2.19569  |            |
| 8    | -1.29067 | -0.00006 | -1.96708 |            |
| 1    | 1.25810  | -0.00036 | 3.16131  |            |
| 1    | 3.37787  | -0.00010 | 1.90010  |            |
| 1    | 3.35398  | 0.00013  | -0.58062 |            |
| 1    | 1.16221  | 0.00012  | -1.78323 |            |
| 1    | -1.28435 | 0.87028  | 2.86312  |            |
| 1    | -3.45194 | -0.00038 | 1.91332  |            |
| 1    | -3.43745 | -0.00014 | -0.53515 |            |
| 1    | -1.28432 | -0.87163 | 2.86266  |            |

E= -461.019251 (Hartree)

#### TS 0-4

| Atom | X        | Y        | Z        | (Angstrom) |
|------|----------|----------|----------|------------|
| 6    | -0.00549 | 0.04032  | -0.00681 |            |
| 6    | -0.01807 | -0.01123 | 1.40920  |            |
| 6    | 1.21439  | -0.04663 | 2.10591  |            |
| 6    | 2.40323  | -0.03529 | 1.42233  |            |
| 6    | 2.41130  | 0.00738  | 0.01172  |            |
| 6    | 1.22979  | 0.03987  | -0.68696 |            |
| 6    | -1.25209 | 0.04443  | -0.71838 |            |
| 6    | -2.44900 | 0.10833  | -0.00952 |            |
| 6    | -2.45142 | 0.04567  | 1.39580  |            |
| 6    | -1.26800 | -0.01128 | 2.09053  |            |
| 1    | 1.20141  | -0.08288 | 3.18997  |            |
| 1    | 3.34150  | -0.06272 | 1.96322  |            |
| 1    | 3.35585  | 0.00869  | -0.51876 |            |
| 1    | 1.22670  | 0.05358  | -1.77106 |            |
| 1    | -1.26847 | -0.05053 | 3.17455  |            |
| 1    | -3.39394 | 0.05603  | 1.92945  |            |
| 1    | -3.38291 | 0.15833  | -0.55395 |            |
| 1    | -1.23839 | 0.24962  | -1.78036 |            |
| 8    | -1.46304 | -1.92502 | -1.25688 |            |
| 1    | -1.43010 | -2.28386 | -0.35735 |            |

E= -461.535824 (Hartree)

#### 4

| Atom | X        | Y        | Z        | (Angstrom) |
|------|----------|----------|----------|------------|
| 6    | -0.01489 | -0.02519 | 0.00514  |            |
| 6    | -0.01123 | -0.02532 | 1.43885  |            |
| 6    | 1.21458  | 0.04146  | 2.13331  |            |
| 6    | 2.53903  | 0.00308  | 1.39932  |            |
| 6    | 2.39755  | 0.09560  | -0.08676 |            |

|   |          |          |          |
|---|----------|----------|----------|
| 6 | 1.18684  | 0.05614  | -0.71440 |
| 6 | -1.20892 | -0.05449 | 2.17697  |
| 6 | -1.19462 | -0.00956 | 3.55882  |
| 6 | 0.01957  | 0.07951  | 4.24065  |
| 6 | 1.20941  | 0.10694  | 3.52263  |
| 8 | 3.24728  | -1.21520 | 1.65475  |
| 1 | -2.15132 | -0.10816 | 1.64227  |
| 1 | -2.12637 | -0.03284 | 4.11099  |
| 1 | 0.03595  | 0.13337  | 5.32229  |
| 1 | 2.15324  | 0.19349  | 4.05564  |
| 1 | -0.96385 | -0.07304 | -0.51483 |
| 1 | 1.14912  | 0.08253  | -1.79753 |
| 1 | 3.31988  | 0.12586  | -0.65353 |
| 1 | 3.15402  | 0.84375  | 1.75700  |
| 1 | 3.24495  | -1.36001 | 2.60504  |

E= -461.574403 (Hartree)

**TS 4<sup>-1</sup>2 (H loss)**

| Atom | X        | Y        | X        | (Angstrom) |
|------|----------|----------|----------|------------|
| 6    | -0.02042 | 0.08940  | 0.04211  |            |
| 6    | 0.00457  | 0.01296  | 1.41326  |            |
| 6    | 1.23420  | -0.07367 | 2.09863  |            |
| 6    | 2.41653  | -0.07412 | 1.40352  |            |
| 6    | 2.42695  | 0.01358  | -0.00977 |            |
| 6    | 1.18531  | 0.09165  | -0.68633 |            |
| 6    | 1.19518  | 0.12912  | -2.12777 |            |
| 6    | 2.39799  | 0.32177  | -2.80710 |            |
| 6    | 3.61530  | 0.22723  | -2.11442 |            |
| 6    | 3.63884  | 0.05278  | -0.75378 |            |
| 8    | -0.01640 | 0.33852  | -2.71652 |            |
| 1    | 2.38446  | 0.45916  | -3.88299 |            |
| 1    | 4.54303  | 0.30412  | -2.66835 |            |
| 1    | 4.58073  | -0.01868 | -0.22240 |            |
| 1    | 3.36400  | -0.13717 | 1.92773  |            |
| 1    | 1.24118  | -0.13877 | 3.18028  |            |
| 1    | -0.92299 | 0.01713  | 1.97282  |            |
| 1    | -0.95634 | 0.14681  | -0.49850 |            |
| 1    | 1.27109  | -1.62084 | -2.25639 |            |
| 1    | 0.08427  | 0.28987  | -3.67078 |            |

E= -461.522561 (Hartree)

**TS 4<sup>-1</sup>2 (H-abstraction by O<sub>2</sub>)**

| Atom | X        | Y        | X        | (Angstrom) |
|------|----------|----------|----------|------------|
| 6    | 0.02817  | 0.02662  | -0.00117 |            |
| 6    | 0.04137  | 0.04176  | 1.42480  |            |
| 6    | 1.28030  | -0.00551 | 2.10924  |            |
| 6    | 2.52690  | 0.13228  | 1.31954  |            |
| 6    | 2.42838  | -0.14985 | -0.09236 |            |
| 6    | 1.20097  | -0.10947 | -0.73016 |            |
| 6    | 1.30414  | -0.08488 | 3.50407  |            |
| 6    | 0.12157  | -0.10450 | 4.21928  |            |
| 6    | -1.11156 | -0.03323 | 3.55332  |            |
| 6    | -1.15234 | 0.03405  | 2.17957  |            |

|   |          |          |          |
|---|----------|----------|----------|
| 8 | 3.70881  | -0.29151 | 1.92113  |
| 8 | 3.09554  | 2.61319  | 1.98885  |
| 8 | 3.63313  | 2.28133  | 3.05144  |
| 1 | 3.35590  | -0.28336 | -0.63528 |
| 1 | 1.15514  | -0.20972 | -1.80768 |
| 1 | -0.92836 | 0.06087  | -0.50997 |
| 1 | -2.10177 | 0.07332  | 1.65697  |
| 1 | -2.03233 | -0.04249 | 4.12397  |
| 1 | 0.14610  | -0.17767 | 5.29978  |
| 1 | 2.25564  | -0.14680 | 4.01671  |
| 1 | 2.62764  | 1.34937  | 1.30217  |
| 1 | 3.95619  | 0.36337  | 2.58803  |

E= -611.863862 (Hartree)

**TS 4-<sup>1</sup>2 (H-abstraction by O)**

| Atom | X        | Y        | X        | (Angstrom) |
|------|----------|----------|----------|------------|
| 6    | -0.01275 | 0.05985  | -0.01259 |            |
| 6    | -0.01778 | -0.01527 | 1.39441  |            |
| 6    | 1.21404  | -0.12665 | 2.07386  |            |
| 6    | 2.40534  | -0.16337 | 1.35246  |            |
| 6    | 2.39013  | -0.08141 | -0.03164 |            |
| 6    | 1.17455  | 0.02958  | -0.71529 |            |
| 6    | 1.24982  | -0.26488 | 3.57116  |            |
| 6    | -0.04036 | 0.01903  | 4.23574  |            |
| 6    | -1.21955 | 0.10929  | 3.53699  |            |
| 6    | -1.23729 | 0.06447  | 2.14212  |            |
| 8    | 2.34549  | 0.40319  | 4.17343  |            |
| 8    | 3.04832  | -2.21892 | 3.91560  |            |
| 1    | -0.01793 | 0.08593  | 5.31715  |            |
| 1    | -2.15078 | 0.24517  | 4.07470  |            |
| 1    | -2.17422 | 0.14169  | 1.60342  |            |
| 1    | -0.95881 | 0.14530  | -0.53633 |            |
| 1    | 1.16592  | 0.08948  | -1.79700 |            |
| 1    | 3.32121  | -0.11032 | -0.58493 |            |
| 1    | 3.33564  | -0.26691 | 1.89797  |            |
| 1    | 1.49588  | -1.34636 | 3.78586  |            |
| 1    | 2.23580  | 1.34289  | 3.99426  |            |

E= -536.643729 (Hartree)

**TS 4-<sup>1</sup>2 (H-abstraction by OH)**

| Atom | X       | Y        | X        | (Angstrom) |
|------|---------|----------|----------|------------|
| 6    | 0.08477 | -0.25508 | -0.16218 |            |
| 6    | 0.02622 | -0.25679 | 1.22585  |            |
| 6    | 1.19943 | -0.12775 | 1.97341  |            |
| 6    | 2.41599 | 0.01032  | 1.33259  |            |
| 6    | 2.49471 | 0.01808  | -0.07304 |            |
| 6    | 1.30635 | -0.12473 | -0.81961 |            |
| 6    | 1.34553 | -0.19195 | -2.32842 |            |
| 6    | 2.64871 | 0.22633  | -2.90639 |            |
| 6    | 3.78130 | 0.35761  | -2.14376 |            |
| 6    | 3.74239 | 0.21921  | -0.75337 |            |
| 8    | 0.23953 | 0.45623  | -2.93428 |            |
| 1    | 2.67375 | 0.35583  | -3.98194 |            |

|   |          |          |          |
|---|----------|----------|----------|
| 1 | 4.72321  | 0.59605  | -2.62444 |
| 1 | 4.64596  | 0.32419  | -0.16525 |
| 1 | 3.32836  | 0.12098  | 1.90877  |
| 1 | 1.15541  | -0.13056 | 3.05593  |
| 1 | -0.92919 | -0.35640 | 1.72677  |
| 1 | -0.81435 | -0.35252 | -0.76072 |
| 1 | 1.19140  | -1.26389 | -2.61777 |
| 8 | 0.17718  | -2.76084 | -2.18931 |
| 1 | 0.38087  | -2.58961 | -1.25385 |
| 1 | 0.31284  | 1.39175  | -2.71940 |

E= -537.309045 (Hartree)

**A (see Scheme S2)**

| Atom | X        | Y        | Z        | (Angstrom) |
|------|----------|----------|----------|------------|
| 6    | -0.03615 | 0.22287  | 0.09390  |            |
| 6    | -0.03846 | -0.01227 | 1.47658  |            |
| 6    | 1.10115  | -0.35048 | 2.14773  |            |
| 6    | 2.41952  | -0.44928 | 1.46378  |            |
| 6    | 2.37051  | -0.28066 | -0.03139 |            |
| 8    | 3.26192  | 0.62781  | 2.04313  |            |
| 8    | 4.51555  | 0.30642  | 2.05833  |            |
| 1    | 2.95594  | -1.36283 | 1.73595  |            |
| 1    | 1.09176  | -0.52017 | 3.21699  |            |
| 1    | -0.97021 | 0.07341  | 2.02368  |            |
| 1    | -0.95013 | 0.50117  | -0.41586 |            |
| 6    | 3.52925  | -0.45451 | -0.78068 |            |
| 6    | 3.51662  | -0.26263 | -2.15656 |            |
| 6    | 2.33180  | 0.10196  | -2.79845 |            |
| 6    | 1.17169  | 0.26846  | -2.06602 |            |
| 6    | 1.16694  | 0.08048  | -0.67187 |            |
| 1    | 4.44816  | -0.72651 | -0.27364 |            |
| 1    | 4.42612  | -0.39764 | -2.72878 |            |
| 1    | 2.32001  | 0.25135  | -3.87134 |            |
| 1    | 0.24661  | 0.54457  | -2.56033 |            |

E= -536.060064 (Hartree)

**TS 1-A**

| Atom | X        | Y        | Z        | (Angstrom) |
|------|----------|----------|----------|------------|
| 6    | 0.26816  | 2.09891  | -0.37357 |            |
| 6    | 1.59531  | 2.02461  | 0.03018  |            |
| 6    | 2.09908  | 0.87328  | 0.60870  |            |
| 6    | 1.29428  | -0.31115 | 0.68753  |            |
| 6    | -0.13502 | -0.17874 | 0.43855  |            |
| 8    | 1.86126  | -1.27413 | -0.71299 |            |
| 8    | 1.32251  | -2.40241 | -0.72489 |            |
| 1    | 1.58350  | -1.06641 | 1.41241  |            |
| 1    | 3.13008  | 0.82715  | 0.93532  |            |
| 1    | 2.23963  | 2.88706  | -0.09188 |            |
| 1    | -0.11578 | 3.00422  | -0.82956 |            |
| 6    | -1.01191 | -1.23680 | 0.70021  |            |
| 6    | -2.35318 | -1.12944 | 0.37665  |            |
| 6    | -2.84453 | 0.04292  | -0.21444 |            |
| 6    | -1.99574 | 1.09765  | -0.47285 |            |

|   |          |          |          |
|---|----------|----------|----------|
| 6 | -0.62521 | 1.01057  | -0.15245 |
| 1 | -0.62420 | -2.14405 | 1.14698  |
| 1 | -3.02650 | -1.95305 | 0.58022  |
| 1 | -3.89565 | 0.11991  | -0.46494 |
| 1 | -2.37260 | 2.00919  | -0.92405 |

E= -536.051044 (Hartree)

**O<sub>2</sub> (<sup>1</sup>Δ<sub>g</sub>)**

| Atom | X       | Y       | X       | (Angstrom) |
|------|---------|---------|---------|------------|
| 8    | 0.00000 | 0.00000 | 0.00000 |            |
| 8    | 0.00000 | 0.00000 | 1.18815 |            |

E= -150.281225 (Hartree)

**TS A-hydroperoxide**

| Atom | X        | Y        | X        | (Angstrom) |
|------|----------|----------|----------|------------|
| 6    | 0.06251  | 0.01221  | 0.03292  |            |
| 6    | 0.01388  | 0.01700  | 1.46263  |            |
| 6    | 1.21740  | 0.00176  | 2.19960  |            |
| 6    | 2.50152  | 0.16205  | 1.45938  |            |
| 6    | 2.46817  | -0.12232 | 0.02962  |            |
| 6    | 1.26797  | -0.09131 | -0.65295 |            |
| 6    | -1.20829 | -0.03592 | 2.16446  |            |
| 6    | -1.22096 | -0.11244 | 3.54033  |            |
| 6    | -0.01530 | -0.13681 | 4.25552  |            |
| 6    | 1.19668  | -0.07111 | 3.58980  |            |
| 8    | 3.62963  | -0.28243 | 2.13882  |            |
| 8    | 4.12279  | 1.02212  | 2.45466  |            |
| 1    | -0.87295 | 0.02243  | -0.51467 |            |
| 1    | -2.13667 | -0.02006 | 1.60407  |            |
| 1    | -2.16365 | -0.15603 | 4.07202  |            |
| 1    | -0.03256 | -0.20502 | 5.33660  |            |
| 1    | 2.13888  | -0.07438 | 4.12453  |            |
| 1    | 1.26104  | -0.19608 | -1.73119 |            |
| 1    | 3.41881  | -0.26134 | -0.46936 |            |
| 1    | 2.70878  | 1.31626  | 1.53425  |            |

E= -536.013801 (Hartree)

**Hydroperoxide**

| Atom | X        | Y        | X        | (Angstrom) |
|------|----------|----------|----------|------------|
| 6    | 0.06821  | 0.00383  | 0.03886  |            |
| 6    | 0.00795  | -0.01610 | 1.45843  |            |
| 6    | 1.21289  | -0.03082 | 2.20866  |            |
| 6    | 2.44023  | -0.01084 | 1.49042  |            |
| 6    | 2.47841  | 0.00605  | 0.12470  |            |
| 6    | 1.27082  | 0.00425  | -0.61178 |            |
| 6    | -1.22722 | -0.03915 | 2.15495  |            |
| 6    | -1.25637 | -0.08756 | 3.52250  |            |
| 6    | -0.05143 | -0.11805 | 4.26201  |            |
| 6    | 1.15935  | -0.08945 | 3.62317  |            |
| 8    | 3.64017  | -0.08880 | 2.17166  |            |
| 8    | 3.79435  | 1.09015  | 2.97284  |            |
| 1    | -0.86113 | 0.01045  | -0.51973 |            |
| 1    | -2.14843 | -0.02269 | 1.58289  |            |

|   |          |          |          |
|---|----------|----------|----------|
| 1 | -2.20505 | -0.10699 | 4.04544  |
| 1 | -0.09011 | -0.16639 | 5.34368  |
| 1 | 2.08686  | -0.10317 | 4.18020  |
| 1 | 1.30803  | 0.01175  | -1.69411 |
| 1 | 3.44075  | 0.00747  | -0.37235 |
| 1 | 4.31426  | 1.65178  | 2.38368  |

E= -536.147797 (Hartree)

## 10

| Atom | X        | Y        | X        | (Angstrom) |
|------|----------|----------|----------|------------|
| 6    | 0.00017  | -0.01451 | -0.00534 |            |
| 6    | 0.00149  | -0.03190 | 1.38660  |            |
| 6    | 1.21392  | -0.03202 | 2.07815  |            |
| 6    | 2.41892  | 0.00431  | 1.37454  |            |
| 6    | 2.41386  | 0.03146  | -0.00980 |            |
| 6    | 1.20117  | 0.01555  | -0.69928 |            |
| 6    | -1.31599 | -0.01754 | 2.13855  |            |
| 6    | -1.20378 | -0.30528 | 3.61246  |            |
| 6    | -0.04168 | -0.32487 | 4.26067  |            |
| 6    | 1.25356  | -0.11887 | 3.56858  |            |
| 8    | 2.29210  | -0.06052 | 4.18680  |            |
| 8    | -2.31682 | -0.72711 | 1.53040  |            |
| 1    | 3.34165  | 0.00314  | 1.94228  |            |
| 1    | 3.34854  | 0.05693  | -0.55662 |            |
| 1    | 1.19495  | 0.02534  | -1.78279 |            |
| 1    | -0.94647 | -0.03846 | -0.53200 |            |
| 1    | 0.02094  | -0.50366 | 5.32786  |            |
| 1    | -2.14774 | -0.47206 | 4.12115  |            |
| 1    | -1.71175 | 1.02298  | 2.06464  |            |

E= -535.555026 (Hartree)

## TS 10-11 (H loss)

| Atom | X        | Y        | X        | (Angstrom) |
|------|----------|----------|----------|------------|
| 6    | 0.08074  | 0.09261  | -0.02017 |            |
| 6    | 0.06480  | 0.07691  | 1.47344  |            |
| 6    | 1.25172  | -0.01870 | 2.20720  |            |
| 6    | 2.58215  | 0.00457  | 1.50057  |            |
| 6    | 2.53795  | -0.17414 | 0.01808  |            |
| 6    | 1.40031  | -0.07927 | -0.67753 |            |
| 6    | -1.16111 | 0.10677  | 2.13845  |            |
| 6    | -1.20014 | 0.04208  | 3.52153  |            |
| 6    | -0.01337 | -0.05778 | 4.25018  |            |
| 6    | 1.20982  | -0.08246 | 3.59822  |            |
| 8    | 3.65324  | -0.31481 | 2.13897  |            |
| 8    | -0.93229 | 0.20703  | -0.67183 |            |
| 1    | -2.06468 | 0.17475  | 1.54448  |            |
| 1    | -2.15180 | 0.06378  | 4.03844  |            |
| 1    | -0.04669 | -0.11721 | 5.33148  |            |
| 1    | 2.14252  | -0.15903 | 4.14379  |            |
| 1    | 1.37620  | -0.16585 | -1.75788 |            |
| 1    | 3.50178  | -0.32064 | -0.45821 |            |
| 1    | 2.71282  | 1.26154  | 1.45642  |            |
| 8    | 2.36453  | 2.66185  | 1.18992  |            |



8 1.40182 2.74887 0.47133  
E= -685.849536 (Hartree)

**TS 10-11 (H-abstraction by O<sub>2</sub>)**

| Atom | X        | Y        | X        | (Angstrom) |
|------|----------|----------|----------|------------|
| 6    | 0.00000  | 0.00054  | 0.00012  |            |
| 6    | 0.00001  | 0.00061  | 1.39197  |            |
| 6    | 1.20925  | 0.00016  | 2.09462  |            |
| 6    | 2.41560  | 0.01005  | 1.39829  |            |
| 6    | 2.41269  | 0.01949  | 0.01111  |            |
| 6    | 1.20510  | 0.01173  | -0.68715 |            |
| 6    | -1.31070 | -0.02259 | 2.12685  |            |
| 6    | -1.24010 | -0.05612 | 3.62366  |            |
| 6    | -0.08020 | -0.08314 | 4.28444  |            |
| 6    | 1.23026  | -0.03290 | 3.58753  |            |
| 8    | 2.26499  | -0.02096 | 4.21433  |            |
| 8    | -2.37074 | -0.22992 | 1.54863  |            |
| 1    | 3.33808  | 0.00556  | 1.96620  |            |
| 1    | 3.35064  | 0.02811  | -0.53072 |            |
| 1    | 1.20757  | 0.01286  | -1.77051 |            |
| 1    | -0.95109 | -0.01077 | -0.51837 |            |
| 1    | -0.03079 | -0.13383 | 5.36620  |            |
| 1    | -2.20182 | -0.09008 | 4.12372  |            |
| 1    | -1.31556 | 1.68183  | 2.26447  |            |

E= -535.518936 (Hartree)

**TS 10-11 (H-abstraction by OH)**

| Atom | X        | Y        | X        | (Angstrom) |
|------|----------|----------|----------|------------|
| 6    | 0.07790  | 0.20436  | 0.03290  |            |
| 6    | 0.04546  | 0.11027  | 1.52072  |            |
| 6    | 1.22404  | 0.02383  | 2.26426  |            |
| 6    | 2.56944  | 0.13986  | 1.57615  |            |
| 6    | 2.53232  | -0.03940 | 0.08025  |            |
| 6    | 1.40045  | 0.02328  | -0.62034 |            |
| 6    | -1.19103 | 0.06497  | 2.16609  |            |
| 6    | -1.24971 | -0.07678 | 3.54239  |            |
| 6    | -0.07062 | -0.17816 | 4.28029  |            |
| 6    | 1.16265  | -0.12391 | 3.64573  |            |
| 8    | 3.59278  | -0.49840 | 2.18127  |            |
| 8    | -0.92118 | 0.38252  | -0.62695 |            |
| 1    | -2.08753 | 0.13679  | 1.56211  |            |
| 1    | -2.20878 | -0.11420 | 4.04441  |            |
| 1    | -0.11460 | -0.29999 | 5.35606  |            |
| 1    | 2.08496  | -0.20306 | 4.20823  |            |
| 1    | 1.38144  | -0.07110 | -1.70033 |            |
| 1    | 3.49892  | -0.18564 | -0.39130 |            |
| 1    | 2.87741  | 1.22432  | 1.72133  |            |
| 8    | 2.18499  | 2.86247  | 0.98825  |            |
| 1    | 1.93659  | 2.60242  | 0.08394  |            |

E= -611.284329 (Hartree)

**11**

| Atom | X | Y | X | (Angstrom) |
|------|---|---|---|------------|
|------|---|---|---|------------|

|   |          |          |          |
|---|----------|----------|----------|
| 6 | -0.04854 | -0.04544 | -0.02828 |
| 6 | -0.01269 | -0.05484 | 1.46463  |
| 6 | 1.20768  | -0.05250 | 2.14749  |
| 6 | 2.49874  | -0.04072 | 1.39700  |
| 6 | 2.42209  | -0.03142 | -0.08914 |
| 6 | 1.25809  | -0.03381 | -0.74046 |
| 6 | -1.20891 | -0.06596 | 2.17588  |
| 6 | -1.18486 | -0.07467 | 3.56377  |
| 6 | 0.03187  | -0.07232 | 4.24459  |
| 6 | 1.22729  | -0.06128 | 3.53906  |
| 8 | 3.56894  | -0.03865 | 1.95904  |
| 1 | -2.14025 | -0.06757 | 1.62271  |
| 1 | -2.11484 | -0.08333 | 4.11924  |
| 1 | 0.04499  | -0.07910 | 5.32777  |
| 1 | 2.18592  | -0.05929 | 4.04345  |
| 1 | 1.19421  | -0.02726 | -1.82284 |
| 1 | 3.37797  | -0.02281 | -0.60091 |
| 8 | -1.08743 | -0.04713 | -0.64628 |

E= -535.032520 (Hartree)

**TS 1-6**

| Atom | X        | Y        | Z        | (Angstrom) |
|------|----------|----------|----------|------------|
| 6    | -0.55090 | -0.58462 | 0.29616  |            |
| 6    | -0.20611 | -0.14645 | 1.58604  |            |
| 6    | 1.14215  | 0.18741  | 1.86609  |            |
| 6    | 2.09623  | 0.11050  | 0.82495  |            |
| 6    | 1.73314  | -0.30796 | -0.43320 |            |
| 6    | 0.40024  | -0.67025 | -0.69842 |            |
| 6    | -1.20381 | 0.02850  | 2.62888  |            |
| 6    | -0.74300 | 0.11935  | 3.96716  |            |
| 6    | 0.58830  | 0.44115  | 4.22713  |            |
| 6    | 1.50902  | 0.53362  | 3.20002  |            |
| 6    | -1.88485 | 1.93303  | 2.26372  |            |
| 6    | -2.91873 | 2.18160  | 3.27291  |            |
| 6    | -4.26959 | 1.94642  | 2.97616  |            |
| 6    | -4.67063 | 1.45115  | 1.59443  |            |
| 6    | -3.60927 | 1.67942  | 0.54902  |            |
| 6    | -2.33213 | 1.91150  | 0.87964  |            |
| 6    | -2.58366 | 2.65920  | 4.54764  |            |
| 6    | -3.56325 | 2.88832  | 5.50055  |            |
| 6    | -4.90219 | 2.65041  | 5.19482  |            |
| 6    | -5.24962 | 2.18760  | 3.93250  |            |
| 8    | -5.91166 | 1.87667  | 1.19386  |            |
| 1    | -1.54127 | 2.85643  | 4.77558  |            |
| 1    | -3.28723 | 3.26208  | 6.47951  |            |
| 1    | -5.67148 | 2.83526  | 5.93468  |            |
| 1    | -6.28798 | 2.02505  | 3.66826  |            |
| 1    | -1.58979 | 2.04981  | 0.10140  |            |
| 1    | -3.94498 | 1.64555  | -0.48090 |            |
| 1    | -4.84094 | 0.34887  | 1.66532  |            |
| 1    | -0.92352 | 2.40445  | 2.44985  |            |
| 1    | -1.45453 | 0.04691  | 4.77996  |            |
| 1    | 0.90709  | 0.60823  | 5.24964  |            |

|   |          |          |          |
|---|----------|----------|----------|
| 1 | 2.54091  | 0.79414  | 3.40658  |
| 1 | -2.17413 | -0.42878 | 2.45383  |
| 1 | 3.12620  | 0.37363  | 1.04117  |
| 1 | 2.47505  | -0.36922 | -1.22042 |
| 1 | 0.12188  | -1.01703 | -1.68629 |
| 1 | -1.58252 | -0.85077 | 0.09211  |

E= -846.695906 (Hartree)

**6**

| Atom | X        | Y        | Z        | (Angstrom) |
|------|----------|----------|----------|------------|
| 6    | -0.41415 | -0.58848 | 0.24618  |            |
| 6    | -0.10057 | -0.14278 | 1.52625  |            |
| 6    | 1.24857  | 0.12269  | 1.85294  |            |
| 6    | 2.23016  | -0.00036 | 0.85250  |            |
| 6    | 1.89546  | -0.41458 | -0.42353 |            |
| 6    | 0.57003  | -0.72842 | -0.72642 |            |
| 6    | -1.17914 | 0.12271  | 2.55130  |            |
| 6    | -0.66280 | 0.01648  | 3.95309  |            |
| 6    | 0.65518  | 0.24874  | 4.23647  |            |
| 6    | 1.60219  | 0.40947  | 3.21445  |            |
| 6    | -1.77679 | 1.58454  | 2.33225  |            |
| 6    | -2.85180 | 1.88728  | 3.35225  |            |
| 6    | -4.19133 | 1.61055  | 3.07077  |            |
| 6    | -4.57263 | 1.07306  | 1.69909  |            |
| 6    | -3.57924 | 1.47735  | 0.63459  |            |
| 6    | -2.31022 | 1.72897  | 0.93136  |            |
| 6    | -2.52666 | 2.44509  | 4.59027  |            |
| 6    | -3.51001 | 2.69973  | 5.53640  |            |
| 6    | -4.84026 | 2.40534  | 5.25160  |            |
| 6    | -5.17897 | 1.86962  | 4.01681  |            |
| 8    | -5.87118 | 1.31576  | 1.34421  |            |
| 1    | -1.48958 | 2.67994  | 4.80638  |            |
| 1    | -3.24033 | 3.13553  | 6.49113  |            |
| 1    | -5.61233 | 2.60719  | 5.98432  |            |
| 1    | -6.21216 | 1.66466  | 3.76399  |            |
| 1    | -1.61066 | 2.00646  | 0.15080  |            |
| 1    | -3.97036 | 1.54868  | -0.37416 |            |
| 1    | -4.57037 | -0.04149 | 1.75345  |            |
| 1    | -0.93677 | 2.27009  | 2.48036  |            |
| 1    | -1.37832 | -0.14116 | 4.75025  |            |
| 1    | 0.98221  | 0.28499  | 5.26985  |            |
| 1    | 2.63734  | 0.62423  | 3.45120  |            |
| 1    | -2.01385 | -0.57062 | 2.39656  |            |
| 1    | 3.26356  | 0.21337  | 1.10452  |            |
| 1    | 2.66355  | -0.51066 | -1.18148 |            |
| 1    | 0.30561  | -1.07810 | -1.71694 |            |
| 1    | -1.44692 | -0.81833 | 0.00601  |            |

E= -846.713381 (Hartree)

**TS 1-7**

| Atom | X        | Y        | Z       | (Angstrom) |
|------|----------|----------|---------|------------|
| 6    | -0.24480 | -0.89508 | 0.20617 |            |
| 6    | -0.31173 | -0.31572 | 1.48593 |            |

|   |          |          |          |
|---|----------|----------|----------|
| 6 | 0.86520  | 0.19679  | 2.07942  |
| 6 | 2.08260  | 0.12423  | 1.36362  |
| 6 | 2.12610  | -0.44538 | 0.11473  |
| 6 | 0.95278  | -0.96354 | -0.46813 |
| 6 | 0.79533  | 0.74189  | 3.39358  |
| 6 | -0.38358 | 0.73599  | 4.10509  |
| 6 | -1.55423 | 0.22718  | 3.53163  |
| 6 | -1.55927 | -0.19552 | 2.19480  |
| 8 | -2.21075 | 1.52156  | 1.38778  |
| 6 | -3.51964 | 1.34260  | 0.91947  |
| 6 | -4.48656 | 0.99151  | 2.03681  |
| 6 | -5.23493 | -0.20354 | 2.01042  |
| 6 | -5.14919 | -1.07660 | 0.87382  |
| 6 | -4.33348 | -0.75241 | -0.22181 |
| 6 | -3.57770 | 0.38695  | -0.23754 |
| 6 | -6.05476 | -0.51481 | 3.11384  |
| 6 | -6.13645 | 0.33633  | 4.19899  |
| 6 | -5.39780 | 1.52294  | 4.21300  |
| 6 | -4.57688 | 1.83688  | 3.13766  |
| 1 | -6.62530 | -1.43746 | 3.09849  |
| 1 | -6.77453 | 0.08458  | 5.03788  |
| 1 | -5.46312 | 2.19363  | 5.06124  |
| 1 | -3.97273 | 2.73831  | 3.15025  |
| 1 | -5.73282 | -1.98915 | 0.87129  |
| 1 | -4.30297 | -1.42694 | -1.07089 |
| 1 | -2.93479 | 0.62159  | -1.07830 |
| 1 | -3.78650 | 2.35209  | 0.55220  |
| 1 | 1.70210  | 1.13719  | 3.83890  |
| 1 | -0.40494 | 1.11872  | 5.11837  |
| 1 | -2.48207 | 0.21293  | 4.09092  |
| 1 | -2.40484 | -0.76675 | 1.82719  |
| 1 | 2.98335  | 0.52072  | 1.81996  |
| 1 | 3.06342  | -0.49885 | -0.42580 |
| 1 | 0.99745  | -1.41412 | -1.45248 |
| 1 | -1.15573 | -1.28037 | -0.23925 |

E= -846.712281 (Hartree)

## 7

| Atom | X        | Y        | Z        | (Angstrom) |
|------|----------|----------|----------|------------|
| 6    | 0.18266  | -0.37547 | 0.00090  |            |
| 6    | 0.06718  | -0.11804 | 1.36210  |            |
| 6    | 1.22638  | 0.10293  | 2.13453  |            |
| 6    | 2.47908  | 0.09415  | 1.49369  |            |
| 6    | 2.57954  | -0.14292 | 0.13572  |            |
| 6    | 1.42845  | -0.38755 | -0.61461 |            |
| 6    | 1.12011  | 0.27542  | 3.55510  |            |
| 6    | -0.12032 | 0.14893  | 4.19761  |            |
| 6    | -1.27289 | -0.04652 | 3.49235  |            |
| 6    | -1.30484 | -0.04006 | 1.99270  |            |
| 8    | -2.09458 | -1.09233 | 1.44733  |            |
| 6    | -3.50542 | -0.97171 | 1.64078  |            |
| 6    | -4.20409 | -0.90726 | 0.29755  |            |
| 6    | -5.30943 | -1.73416 | 0.01145  |            |

|   |          |          |          |
|---|----------|----------|----------|
| 6 | -5.75304 | -2.69700 | 0.97796  |
| 6 | -5.06123 | -2.86729 | 2.18651  |
| 6 | -3.98713 | -2.09057 | 2.51118  |
| 6 | -5.93845 | -1.61476 | -1.24252 |
| 6 | -5.48662 | -0.70708 | -2.18099 |
| 6 | -4.38877 | 0.10580  | -1.89114 |
| 6 | -3.75830 | -0.00072 | -0.65832 |
| 1 | 3.37094  | 0.26431  | 2.08746  |
| 1 | 3.55164  | -0.15059 | -0.34272 |
| 1 | 1.50394  | -0.59108 | -1.67585 |
| 1 | -0.71481 | -0.58861 | -0.56820 |
| 1 | 2.02282  | 0.43895  | 4.13077  |
| 1 | -0.15982 | 0.19507  | 5.28020  |
| 1 | -2.22207 | -0.14808 | 4.00728  |
| 1 | -1.76225 | 0.91702  | 1.67484  |
| 1 | -6.60226 | -3.32489 | 0.73836  |
| 1 | -5.37608 | -3.65021 | 2.86718  |
| 1 | -3.42753 | -2.25961 | 3.42380  |
| 1 | -3.69973 | -0.01672 | 2.15886  |
| 1 | -6.78598 | -2.25465 | -1.46421 |
| 1 | -5.98217 | -0.62754 | -3.14114 |
| 1 | -4.02973 | 0.81788  | -2.62415 |
| 1 | -2.90222 | 0.62757  | -0.43358 |

E= -846.739614 (Hartree)

**TS 7-8 (H loss)**

| Atom | X        | Y        | X        | (Angstrom) |
|------|----------|----------|----------|------------|
| 6    | 0.04821  | -0.10853 | -0.04833 |            |
| 6    | -0.01371 | -0.00671 | 1.33591  |            |
| 6    | 1.18013  | 0.07869  | 2.08583  |            |
| 6    | 2.40716  | 0.13108  | 1.40061  |            |
| 6    | 2.45331  | 0.06559  | 0.02019  |            |
| 6    | 1.27240  | -0.07226 | -0.70805 |            |
| 6    | 1.13020  | 0.01102  | 3.51870  |            |
| 6    | -0.07590 | -0.28636 | 4.17159  |            |
| 6    | -1.25685 | -0.34862 | 3.48967  |            |
| 6    | -1.34384 | 0.06186  | 2.05225  |            |
| 8    | -2.29297 | -0.73271 | 1.32367  |            |
| 6    | -3.62495 | -0.40782 | 1.38768  |            |
| 6    | -4.13788 | 0.68315  | 0.59080  |            |
| 6    | -5.54320 | 0.87716  | 0.56141  |            |
| 6    | -6.39560 | -0.05097 | 1.22074  |            |
| 6    | -5.88064 | -1.16873 | 1.82725  |            |
| 6    | -4.49357 | -1.37691 | 1.87808  |            |
| 6    | -6.06325 | 1.97538  | -0.16534 |            |
| 6    | -5.23043 | 2.82891  | -0.84202 |            |
| 6    | -3.83686 | 2.61710  | -0.82615 |            |
| 6    | -3.30016 | 1.56621  | -0.12186 |            |
| 1    | 3.32389  | 0.20068  | 1.97622  |            |
| 1    | 3.40715  | 0.10041  | -0.49242 |            |
| 1    | 1.30526  | -0.15734 | -1.78736 |            |
| 1    | -0.86846 | -0.24531 | -0.60860 |            |
| 1    | 2.05560  | 0.07977  | 4.07693  |            |

|   |          |          |          |
|---|----------|----------|----------|
| 1 | -0.06406 | -0.48967 | 5.23632  |
| 1 | -2.18656 | -0.59741 | 3.98734  |
| 1 | -1.69407 | 1.10809  | 2.02515  |
| 1 | -7.46640 | 0.11610  | 1.19098  |
| 1 | -6.54317 | -1.90021 | 2.27349  |
| 1 | -4.06389 | -2.25192 | 2.34907  |
| 1 | -3.72741 | 0.61056  | 2.86666  |
| 1 | -7.13753 | 2.12367  | -0.18265 |
| 1 | -5.64104 | 3.66347  | -1.39732 |
| 1 | -3.18557 | 3.28602  | -1.37562 |
| 1 | -2.22890 | 1.41009  | -0.12042 |

E= -846.683606 (Hartree)

**TS 7-8 (H-abstraction by O<sub>2</sub>)**

| Atom | X        | Y        | Z        | (Angstrom) |
|------|----------|----------|----------|------------|
| 6    | -0.18677 | 0.45159  | 0.02367  |            |
| 6    | -0.12233 | 0.16514  | 1.39100  |            |
| 6    | 1.08495  | -0.30228 | 1.94508  |            |
| 6    | 2.20007  | -0.48777 | 1.11025  |            |
| 6    | 2.12306  | -0.20716 | -0.23808 |            |
| 6    | 0.92483  | 0.27116  | -0.77990 |            |
| 6    | 1.17412  | -0.51301 | 3.37052  |            |
| 6    | 0.14073  | -0.25318 | 4.20453  |            |
| 6    | -1.12731 | 0.15773  | 3.68016  |            |
| 6    | -1.31663 | 0.26290  | 2.26418  |            |
| 8    | -2.28851 | 1.19512  | 1.86761  |            |
| 6    | -3.41855 | 0.68480  | 1.16074  |            |
| 6    | -3.96986 | 1.77672  | 0.26979  |            |
| 6    | -5.34449 | 1.77056  | -0.05439 |            |
| 6    | -6.23665 | 0.88252  | 0.63631  |            |
| 6    | -5.78301 | 0.13989  | 1.73610  |            |
| 6    | -4.45845 | 0.09598  | 2.06733  |            |
| 6    | -5.82488 | 2.70894  | -0.98413 |            |
| 6    | -4.97885 | 3.64697  | -1.54803 |            |
| 6    | -3.63435 | 3.67880  | -1.18034 |            |
| 6    | -3.13695 | 2.74598  | -0.27576 |            |
| 1    | -6.87941 | 2.70003  | -1.23781 |            |
| 1    | -5.36483 | 4.36683  | -2.25974 |            |
| 1    | -2.97430 | 4.43065  | -1.59605 |            |
| 1    | -2.09913 | 2.78024  | 0.03084  |            |
| 1    | -7.28685 | 0.88872  | 0.37230  |            |
| 1    | -6.50329 | -0.38898 | 2.34973  |            |
| 1    | -4.11768 | -0.44841 | 2.93820  |            |
| 1    | -3.06118 | -0.12734 | 0.49850  |            |
| 1    | 2.12679  | -0.84061 | 3.77378  |            |
| 1    | 0.25397  | -0.35642 | 5.27630  |            |
| 1    | -1.84779 | 0.65038  | 4.32053  |            |
| 1    | -1.78317 | -0.90011 | 2.14745  |            |
| 1    | 3.12601  | -0.84892 | 1.54474  |            |
| 1    | 2.98740  | -0.35051 | -0.87467 |            |
| 1    | 0.86510  | 0.50030  | -1.83711 |            |
| 1    | -1.11156 | 0.81886  | -0.40452 |            |
| 8    | -2.27841 | -2.06174 | 2.77866  |            |

8        -2.11498        -1.66114        3.95034  
 E= -997.035742 (Hartree)

**TS 7-8 (H-abstraction by OH)**

| Atom | X        | Y        | Z        | (Angstrom) |
|------|----------|----------|----------|------------|
| 6    | -0.22452 | -0.21163 | 0.10464  |            |
| 6    | -0.08664 | -0.04559 | 1.48044  |            |
| 6    | 1.19550  | 0.18510  | 2.02229  |            |
| 6    | 2.30009  | 0.26530  | 1.15158  |            |
| 6    | 2.14255  | 0.11415  | -0.21181 |            |
| 6    | 0.87335  | -0.13031 | -0.74129 |            |
| 6    | 1.35851  | 0.32785  | 3.43887  |            |
| 6    | 0.25373  | 0.25307  | 4.29798  |            |
| 6    | -1.00924 | 0.05036  | 3.81996  |            |
| 6    | -1.31239 | -0.10478 | 2.36704  |            |
| 8    | -2.24061 | 0.93357  | 2.00320  |            |
| 6    | -3.39461 | 0.51478  | 1.29395  |            |
| 6    | -3.85832 | 1.63672  | 0.39417  |            |
| 6    | -5.23642 | 1.85035  | 0.17937  |            |
| 6    | -6.20261 | 1.10658  | 0.93605  |            |
| 6    | -5.79357 | 0.24923  | 1.97052  |            |
| 6    | -4.47058 | 0.00105  | 2.20659  |            |
| 6    | -5.63226 | 2.84207  | -0.73710 |            |
| 6    | -4.69216 | 3.60430  | -1.40489 |            |
| 6    | -3.33216 | 3.39872  | -1.16729 |            |
| 6    | -2.92184 | 2.41845  | -0.27152 |            |
| 1    | -6.69117 | 3.00970  | -0.90204 |            |
| 1    | -5.01216 | 4.36714  | -2.10453 |            |
| 1    | -2.59431 | 4.00514  | -1.67839 |            |
| 1    | -1.86928 | 2.25892  | -0.06767 |            |
| 1    | -7.25582 | 1.28556  | 0.75833  |            |
| 1    | -6.54560 | -0.19500 | 2.61340  |            |
| 1    | -4.15374 | -0.62014 | 3.03817  |            |
| 1    | -3.10134 | -0.31697 | 0.62726  |            |
| 1    | 2.35120  | 0.50278  | 3.83544  |            |
| 1    | 0.40613  | 0.37331  | 5.36459  |            |
| 1    | -1.86149 | 0.03198  | 4.48919  |            |
| 1    | -1.80967 | -1.07784 | 2.20467  |            |
| 1    | 3.28382  | 0.44611  | 1.57186  |            |
| 1    | 3.00191  | 0.17766  | -0.86865 |            |
| 1    | 0.74377  | -0.26237 | -1.80861 |            |
| 1    | -1.20443 | -0.41184 | -0.31528 |            |
| 8    | -3.14639 | -2.53077 | 1.12703  |            |
| 1    | -4.07893 | -2.25546 | 1.19210  |            |

E= -922.470442 (Hartree)

**"TS" 1-8 Maximum on the Free Energy Surface. (C-O = 3.50 A)**

| Atom | X        | Y        | Z       | (Angstrom) |
|------|----------|----------|---------|------------|
| 6    | -0.41930 | 0.95956  | 0.24988 |            |
| 6    | -0.31307 | 0.15218  | 1.37694 |            |
| 6    | 0.94803  | -0.10597 | 1.95482 |            |
| 6    | 2.08379  | 0.48114  | 1.36442 |            |
| 6    | 1.96743  | 1.28476  | 0.24613 |            |

|   |          |          |          |
|---|----------|----------|----------|
| 6 | 0.71192  | 1.53358  | -0.31435 |
| 6 | 1.04489  | -0.90280 | 3.14007  |
| 6 | -0.10960 | -1.39580 | 3.77395  |
| 6 | -1.35299 | -1.19106 | 3.25584  |
| 6 | -1.56927 | -0.50682 | 1.93594  |
| 8 | -1.86599 | -1.41644 | 0.91953  |
| 6 | -4.93189 | -1.02245 | 2.56120  |
| 6 | -5.29620 | -0.01056 | 1.66171  |
| 6 | -6.36905 | 0.83351  | 2.07764  |
| 6 | -6.98680 | 0.59998  | 3.33607  |
| 6 | -6.57178 | -0.41530 | 4.15545  |
| 6 | -5.50032 | -1.26666 | 3.76266  |
| 6 | -6.77930 | 1.87931  | 1.21115  |
| 6 | -6.16035 | 2.07190  | 0.00552  |
| 6 | -5.09901 | 1.22785  | -0.40121 |
| 6 | -4.67280 | 0.20603  | 0.40455  |
| 1 | 3.05692  | 0.29418  | 1.80517  |
| 1 | 2.85291  | 1.72638  | -0.19505 |
| 1 | 0.62123  | 2.16881  | -1.18662 |
| 1 | -1.40065 | 1.13542  | -0.17797 |
| 1 | 2.02420  | -1.08988 | 3.56250  |
| 1 | -0.00157 | -1.94618 | 4.70169  |
| 1 | -2.23888 | -1.56954 | 3.75254  |
| 1 | -2.36975 | 0.24398  | 2.00197  |
| 1 | -7.80176 | 1.24761  | 3.63957  |
| 1 | -7.05563 | -0.57931 | 5.11118  |
| 1 | -5.16971 | -2.07248 | 4.40755  |
| 1 | -7.59426 | 2.52387  | 1.52248  |
| 1 | -6.48351 | 2.87419  | -0.64693 |
| 1 | -4.62589 | 1.39112  | -1.36221 |
| 1 | -3.86099 | -0.44909 | 0.10675  |

E= -846.033988 (Hartree)

### TS 2-8

| Atom | X        | Y        | Z        | (Angstrom) |
|------|----------|----------|----------|------------|
| 6    | 0.04540  | 0.86011  | 0.13360  |            |
| 6    | -0.08321 | 0.35001  | 1.43275  |            |
| 6    | 0.98637  | -0.37862 | 2.00274  |            |
| 6    | 2.15729  | -0.58441 | 1.24084  |            |
| 6    | 2.26229  | -0.07799 | -0.03406 |            |
| 6    | 1.20109  | 0.65544  | -0.59152 |            |
| 6    | 0.87032  | -0.85163 | 3.34226  |            |
| 6    | -0.25143 | -0.57073 | 4.09838  |            |
| 6    | -1.31554 | 0.14125  | 3.55135  |            |
| 6    | -1.31541 | 0.49961  | 2.18071  |            |
| 8    | -2.33059 | -0.88632 | 1.40423  |            |
| 6    | -3.59926 | -0.84785 | 1.75747  |            |
| 6    | -4.50878 | 0.03857  | 1.07686  |            |
| 6    | -5.86837 | 0.08970  | 1.47899  |            |
| 6    | -6.31163 | -0.74619 | 2.53761  |            |
| 6    | -5.43621 | -1.59768 | 3.16652  |            |
| 6    | -4.08209 | -1.64164 | 2.79118  |            |
| 6    | -6.74512 | 0.97675  | 0.80464  |            |



|   |          |          |          |
|---|----------|----------|----------|
| 6 | -6.29381 | 1.76368  | -0.22294 |
| 6 | -4.94481 | 1.69112  | -0.63483 |
| 6 | -4.07297 | 0.84249  | 0.00032  |
| 1 | 2.97522  | -1.14730 | 1.67767  |
| 1 | 3.16468  | -0.24201 | -0.61047 |
| 1 | 1.29094  | 1.05576  | -1.59399 |
| 1 | -0.77795 | 1.42199  | -0.29382 |
| 1 | 1.69357  | -1.41454 | 3.76797  |
| 1 | -0.30104 | -0.89904 | 5.12973  |
| 1 | -2.19501 | 0.35278  | 4.14724  |
| 1 | -7.35299 | -0.70439 | 2.83695  |
| 1 | -5.78616 | -2.23668 | 3.96889  |
| 1 | -3.38038 | -2.29923 | 3.29088  |
| 1 | -7.78383 | 1.01792  | 1.11454  |
| 1 | -6.97399 | 2.43752  | -0.73021 |
| 1 | -4.60474 | 2.30131  | -1.46310 |
| 1 | -3.04356 | 0.74418  | -0.32277 |
| 1 | -1.99981 | 1.27537  | 1.85117  |

E= -846.175383 (Hartree)

### Naphthyl radical 5

| Atom | X        | Y       | Z        | (Angstrom) |
|------|----------|---------|----------|------------|
| 6    | -0.01112 | 0.00000 | 0.00700  |            |
| 6    | 0.01855  | 0.00000 | 1.42502  |            |
| 6    | 1.20899  | 0.00000 | 2.10103  |            |
| 6    | 2.43628  | 0.00000 | 1.39613  |            |
| 6    | 2.44895  | 0.00000 | 0.02762  |            |
| 1    | -0.92215 | 0.00000 | 1.96510  |            |
| 1    | 1.21569  | 0.00000 | 3.18439  |            |
| 1    | 3.36911  | 0.00000 | 1.94681  |            |
| 1    | 3.38169  | 0.00000 | -0.52345 |            |
| 6    | -1.22474 | 0.00000 | -0.73118 |            |
| 6    | -1.22448 | 0.00000 | -2.10071 |            |
| 6    | 0.00231  | 0.00000 | -2.82194 |            |
| 6    | 1.14259  | 0.00000 | -2.09590 |            |
| 6    | 1.23020  | 0.00000 | -0.69752 |            |
| 1    | -2.16197 | 0.00000 | -0.18601 |            |
| 1    | -2.16096 | 0.00000 | -2.64635 |            |
| 1    | 0.00744  | 0.00000 | -3.90555 |            |

E= -385.125532 (Hartree)

### TS 2-9

| Atom | X        | Y        | Z        | (Angstrom) |
|------|----------|----------|----------|------------|
| 6    | -2.28822 | -1.11901 | -0.94371 |            |
| 6    | -2.40319 | -0.27360 | 0.16592  |            |
| 6    | -3.46700 | 0.65379  | 0.24288  |            |
| 6    | -4.40414 | 0.70520  | -0.81133 |            |
| 6    | -4.27781 | -0.13245 | -1.89724 |            |
| 6    | -3.21424 | -1.04774 | -1.96655 |            |
| 6    | -3.56117 | 1.51684  | 1.37465  |            |
| 6    | -2.61986 | 1.47124  | 2.39368  |            |
| 6    | -1.55605 | 0.58410  | 2.33636  |            |
| 6    | -1.40868 | -0.33744 | 1.24557  |            |

|   |          |          |          |
|---|----------|----------|----------|
| 8 | -0.46456 | -1.14969 | 1.19912  |
| 6 | 1.15926  | -0.17038 | -0.43034 |
| 6 | 2.46000  | -0.48431 | -0.01982 |
| 6 | 3.51180  | 0.21467  | -0.68307 |
| 6 | 3.18278  | 1.16613  | -1.68676 |
| 6 | 1.88009  | 1.42508  | -2.02166 |
| 6 | 0.81598  | 0.73758  | -1.37089 |
| 6 | 4.84956  | -0.06641 | -0.30484 |
| 6 | 5.11978  | -0.98446 | 0.67452  |
| 6 | 4.06899  | -1.66924 | 1.33151  |
| 6 | 2.76441  | -1.42707 | 0.99497  |
| 1 | -5.22328 | 1.41386  | -0.75475 |
| 1 | -5.00133 | -0.08695 | -2.70233 |
| 1 | -3.12336 | -1.70126 | -2.82587 |
| 1 | -1.45733 | -1.81434 | -0.97400 |
| 1 | -4.38493 | 2.22010  | 1.42521  |
| 1 | -2.71324 | 2.14450  | 3.23750  |
| 1 | -0.80345 | 0.54371  | 3.11417  |
| 1 | -0.21884 | 0.93933  | -1.62783 |
| 1 | 1.64956  | 2.15634  | -2.78821 |
| 1 | 3.99003  | 1.69142  | -2.18537 |
| 1 | 5.65562  | 0.46018  | -0.80482 |
| 1 | 6.14629  | -1.18951 | 0.95488  |
| 1 | 4.30404  | -2.38772 | 2.10781  |
| 1 | 1.93978  | -1.92784 | 1.48704  |

E= -845.528741 (Hartree)

### 8

| Atom | X        | Y        | Z        | (Angstrom) |
|------|----------|----------|----------|------------|
| 6    | 0.04831  | 0.27203  | 0.06570  |            |
| 6    | 0.01923  | 0.40270  | 1.47771  |            |
| 6    | 1.05655  | -0.18594 | 2.25061  |            |
| 6    | 2.07365  | -0.91589 | 1.58277  |            |
| 6    | 2.06853  | -1.04265 | 0.22010  |            |
| 6    | 1.04726  | -0.43617 | -0.54714 |            |
| 6    | 1.06107  | -0.01677 | 3.65939  |            |
| 6    | 0.08214  | 0.71543  | 4.27331  |            |
| 6    | -0.96303 | 1.29120  | 3.51621  |            |
| 6    | -1.00139 | 1.13138  | 2.15618  |            |
| 8    | -2.01342 | 1.71393  | 1.43518  |            |
| 6    | -3.06246 | 0.81667  | 1.00984  |            |
| 6    | -3.88482 | 1.53809  | -0.03147 |            |
| 6    | -5.28826 | 1.39383  | -0.05403 |            |
| 6    | -5.95325 | 0.68030  | 0.99794  |            |
| 6    | -5.22919 | 0.19367  | 2.09569  |            |
| 6    | -3.86838 | 0.29039  | 2.15526  |            |
| 6    | -6.01621 | 2.00991  | -1.08836 |            |
| 6    | -5.37717 | 2.75986  | -2.05761 |            |
| 6    | -3.99232 | 2.92392  | -2.00844 |            |
| 6    | -3.25699 | 2.31501  | -0.99851 |            |
| 1    | -7.09496 | 1.89687  | -1.10644 |            |
| 1    | -5.95276 | 3.23020  | -2.84577 |            |
| 1    | -3.48931 | 3.52894  | -2.75287 |            |

|   |          |          |          |
|---|----------|----------|----------|
| 1 | -2.18512 | 2.46249  | -0.94102 |
| 1 | -7.03138 | 0.58371  | 0.96342  |
| 1 | -5.76624 | -0.26061 | 2.92069  |
| 1 | -3.31807 | -0.09050 | 3.00717  |
| 1 | -2.57129 | -0.04451 | 0.52496  |
| 1 | 1.86077  | -0.46751 | 4.23624  |
| 1 | 0.09628  | 0.85468  | 5.34753  |
| 1 | -1.74830 | 1.86871  | 3.98907  |
| 1 | 2.86202  | -1.36752 | 2.17508  |
| 1 | 2.85290  | -1.60073 | -0.27710 |
| 1 | 1.06185  | -0.52911 | -1.62635 |
| 1 | -0.72482 | 0.75055  | -0.52267 |

E= -846.194466 (Hartree)

**TS 8-9 (H-abstraction by O)**

| Atom | X        | Y        | Z        | (Angstrom) |
|------|----------|----------|----------|------------|
| 6    | 2.14913  | 1.55512  | -0.83520 |            |
| 6    | 2.32104  | 0.26289  | -0.28142 |            |
| 6    | 3.61863  | -0.17615 | 0.08530  |            |
| 6    | 4.71262  | 0.70134  | -0.11751 |            |
| 6    | 4.52508  | 1.94673  | -0.65656 |            |
| 6    | 3.22998  | 2.37779  | -1.01940 |            |
| 6    | 3.78759  | -1.47029 | 0.64863  |            |
| 6    | 2.70727  | -2.28503 | 0.82481  |            |
| 6    | 1.40411  | -1.86902 | 0.45634  |            |
| 6    | 1.21227  | -0.61622 | -0.07643 |            |
| 8    | 0.01298  | -0.09636 | -0.44932 |            |
| 6    | -1.18673 | -0.77606 | -0.10114 |            |
| 6    | -2.28485 | 0.22857  | 0.09024  |            |
| 6    | -3.59721 | -0.07393 | -0.32598 |            |
| 6    | -3.85471 | -1.28668 | -1.04269 |            |
| 6    | -2.81025 | -2.13870 | -1.40572 |            |
| 6    | -1.51551 | -1.88058 | -1.02922 |            |
| 6    | -4.62335 | 0.85298  | -0.05631 |            |
| 6    | -4.35007 | 2.03564  | 0.60029  |            |
| 6    | -3.04368 | 2.32286  | 1.00946  |            |
| 6    | -2.02040 | 1.42066  | 0.75866  |            |
| 8    | -0.21018 | -0.82803 | 2.45465  |            |
| 1    | 5.70589  | 0.36694  | 0.16431  |            |
| 1    | 5.37165  | 2.60735  | -0.80685 |            |
| 1    | 3.09282  | 3.36506  | -1.44606 |            |
| 1    | 1.15264  | 1.87438  | -1.11362 |            |
| 1    | 4.78234  | -1.79634 | 0.93221  |            |
| 1    | 2.83258  | -3.27296 | 1.25338  |            |
| 1    | 0.57868  | -2.55272 | 0.60467  |            |
| 1    | -4.87045 | -1.50436 | -1.35282 |            |
| 1    | -3.02237 | -3.00201 | -2.02689 |            |
| 1    | -0.69925 | -2.50739 | -1.36927 |            |
| 1    | -5.63480 | 0.62435  | -0.37684 |            |
| 1    | -5.14805 | 2.74174  | 0.79971  |            |
| 1    | -2.83018 | 3.25046  | 1.52784  |            |
| 1    | -1.00667 | 1.62590  | 1.08371  |            |
| 1    | -1.01294 | -1.21689 | 0.92711  |            |

E= -921.244568 (Hartree)

**TS 8-9 (H loss)**

| Atom | X        | Y        | X        | (Angstrom) |
|------|----------|----------|----------|------------|
| 6    | 0.10329  | -0.11503 | -0.06250 |            |
| 6    | 0.01717  | -0.02578 | 1.34193  |            |
| 6    | 1.19622  | 0.10402  | 2.11605  |            |
| 6    | 2.44347  | 0.14025  | 1.44656  |            |
| 6    | 2.50941  | 0.05885  | 0.07952  |            |
| 6    | 1.32834  | -0.06847 | -0.68158 |            |
| 6    | 1.09788  | 0.22056  | 3.52942  |            |
| 6    | -0.12904 | 0.27607  | 4.14038  |            |
| 6    | -1.31624 | 0.16788  | 3.39706  |            |
| 6    | -1.24623 | -0.10481 | 2.03424  |            |
| 8    | -2.33886 | -0.04673 | 1.20687  |            |
| 6    | -3.59758 | -0.41358 | 1.61447  |            |
| 6    | -4.65489 | 0.27485  | 0.95144  |            |
| 6    | -5.99339 | -0.08406 | 1.26032  |            |
| 6    | -6.24032 | -1.10528 | 2.21432  |            |
| 6    | -5.19731 | -1.74050 | 2.82759  |            |
| 6    | -3.85698 | -1.39898 | 2.53084  |            |
| 6    | -7.04793 | 0.59775  | 0.60092  |            |
| 6    | -6.78491 | 1.58173  | -0.31352 |            |
| 6    | -5.44967 | 1.93649  | -0.61412 |            |
| 6    | -4.40648 | 1.29906  | 0.00318  |            |
| 1    | -8.07119 | 0.32352  | 0.83727  |            |
| 1    | -7.60101 | 2.09437  | -0.81044 |            |
| 1    | -5.25278 | 2.72016  | -1.33696 |            |
| 1    | -3.38160 | 1.56831  | -0.21945 |            |
| 1    | -7.26588 | -1.37128 | 2.44733  |            |
| 1    | -5.38593 | -2.52360 | 3.55310  |            |
| 1    | -3.04668 | -1.92329 | 3.02045  |            |
| 1    | 2.00835  | 0.30837  | 4.11235  |            |
| 1    | -0.19503 | 0.42240  | 5.21240  |            |
| 1    | -2.28005 | 0.24763  | 3.88266  |            |
| 1    | 3.34851  | 0.23960  | 2.03727  |            |
| 1    | 3.47062  | 0.08987  | -0.42084 |            |
| 1    | 1.39008  | -0.13406 | -1.76183 |            |
| 1    | -0.80703 | -0.22802 | -0.63792 |            |
| 1    | -1.08778 | -1.88458 | 2.15361  |            |

E= -846.118979 (Hartree)

**TS 8-9 (H-abstraction by O<sub>2</sub>)**

| Atom | X        | Y        | X        | (Angstrom) |
|------|----------|----------|----------|------------|
| 6    | 0.17473  | 0.09930  | 0.00555  |            |
| 6    | 0.11327  | 0.01755  | 1.41866  |            |
| 6    | 1.31435  | -0.07398 | 2.16780  |            |
| 6    | 2.54915  | -0.07446 | 1.47085  |            |
| 6    | 2.58599  | 0.00845  | 0.10466  |            |
| 6    | 1.38579  | 0.09410  | -0.63571 |            |
| 6    | 1.25099  | -0.16127 | 3.58396  |            |
| 6    | 0.04077  | -0.15703 | 4.21549  |            |
| 6    | -1.16976 | -0.06534 | 3.48629  |            |

|   |          |          |          |
|---|----------|----------|----------|
| 6 | -1.13251 | 0.02438  | 2.11833  |
| 8 | -2.22314 | 0.14392  | 1.30358  |
| 6 | -3.51973 | 0.04414  | 1.82758  |
| 6 | -4.50382 | 0.80634  | 1.05235  |
| 6 | -5.87594 | 0.50164  | 1.24196  |
| 6 | -6.24103 | -0.62701 | 2.01663  |
| 6 | -5.27918 | -1.49302 | 2.52790  |
| 6 | -3.93378 | -1.22713 | 2.36467  |
| 6 | -6.84178 | 1.31893  | 0.60550  |
| 6 | -6.45589 | 2.35672  | -0.20456 |
| 6 | -5.08883 | 2.62483  | -0.41216 |
| 6 | -4.12569 | 1.86868  | 0.21669  |
| 1 | 3.46827  | -0.14263 | 2.04389  |
| 1 | 3.53808  | 0.00818  | -0.41421 |
| 1 | 1.42574  | 0.15535  | -1.71744 |
| 1 | -0.74942 | 0.15851  | -0.55533 |
| 1 | 2.17336  | -0.23121 | 4.15013  |
| 1 | -0.01144 | -0.22115 | 5.29643  |
| 1 | -2.10546 | -0.06182 | 4.03000  |
| 1 | -7.29461 | -0.84386 | 2.15549  |
| 1 | -5.58829 | -2.40128 | 3.03208  |
| 1 | -3.17238 | -1.91417 | 2.71484  |
| 1 | -7.89339 | 1.10105  | 0.76033  |
| 1 | -7.20420 | 2.97139  | -0.69174 |
| 1 | -4.79477 | 3.44032  | -1.06277 |
| 1 | -3.07239 | 2.08149  | 0.08190  |
| 1 | -3.55380 | 0.79094  | 2.84705  |
| 8 | -3.85148 | 1.81901  | 3.76059  |
| 8 | -4.71940 | 2.51693  | 3.22705  |

E= -996.460101 (Hartree)

**TS 8-9 (H-abstraction by OH)**

| Atom | X        | Y        | Z        | (Angstrom) |
|------|----------|----------|----------|------------|
| 6    | -0.09520 | 0.16560  | 0.07732  |            |
| 6    | -0.06972 | 0.02673  | 1.48639  |            |
| 6    | 1.17429  | -0.01252 | 2.16602  |            |
| 6    | 2.36532  | 0.08767  | 1.40432  |            |
| 6    | 2.31880  | 0.21984  | 0.04164  |            |
| 6    | 1.07612  | 0.25900  | -0.62850 |            |
| 6    | 1.19669  | -0.14088 | 3.58191  |            |
| 6    | 0.02615  | -0.23155 | 4.27802  |            |
| 6    | -1.22821 | -0.19812 | 3.61738  |            |
| 6    | -1.27907 | -0.06812 | 2.24786  |            |
| 8    | -2.40920 | -0.00090 | 1.50648  |            |
| 6    | -3.68300 | 0.11420  | 2.15135  |            |
| 6    | -4.62280 | 0.80862  | 1.20524  |            |
| 6    | -5.94452 | 0.34752  | 1.04274  |            |
| 6    | -6.37262 | -0.84096 | 1.71682  |            |
| 6    | -5.47384 | -1.59303 | 2.47866  |            |
| 6    | -4.17499 | -1.19318 | 2.65489  |            |
| 6    | -6.80971 | 1.05728  | 0.18659  |            |
| 6    | -6.37279 | 2.18207  | -0.48317 |            |
| 6    | -5.06093 | 2.63335  | -0.30819 |            |

|   |          |          |          |
|---|----------|----------|----------|
| 6 | -4.19626 | 1.95088  | 0.53492  |
| 1 | 3.31817  | 0.05846  | 1.92303  |
| 1 | 3.23780  | 0.29475  | -0.52881 |
| 1 | 1.05178  | 0.36254  | -1.70735 |
| 1 | -1.05367 | 0.19130  | -0.42573 |
| 1 | 2.15211  | -0.16781 | 4.09442  |
| 1 | 0.03869  | -0.33186 | 5.35750  |
| 1 | -2.13182 | -0.27676 | 4.20788  |
| 1 | -7.39357 | -1.17978 | 1.58271  |
| 1 | -5.80361 | -2.53131 | 2.91147  |
| 1 | -3.47223 | -1.82105 | 3.19013  |
| 1 | -7.82724 | 0.70223  | 0.05672  |
| 1 | -7.04719 | 2.71776  | -1.14158 |
| 1 | -4.71909 | 3.52122  | -0.82752 |
| 1 | -3.18572 | 2.30597  | 0.69906  |
| 1 | -3.54067 | 0.82550  | 3.00877  |
| 8 | -2.72647 | 2.42791  | 3.41051  |
| 1 | -1.79715 | 2.15104  | 3.50265  |

E= -921.904942 (Hartree)

## 9

| Atom | X        | Y        | Z        | (Angstrom) |
|------|----------|----------|----------|------------|
| 6    | -2.58553 | -0.21856 | -1.57413 |            |
| 6    | -2.23314 | -0.26913 | -0.20277 |            |
| 6    | -3.20494 | 0.03541  | 0.78576  |            |
| 6    | -4.51405 | 0.37849  | 0.36290  |            |
| 6    | -4.83474 | 0.42032  | -0.96766 |            |
| 6    | -3.85981 | 0.12051  | -1.94631 |            |
| 6    | -2.84303 | -0.00337 | 2.15833  |            |
| 6    | -1.56669 | -0.32806 | 2.52258  |            |
| 6    | -0.58339 | -0.63482 | 1.55209  |            |
| 6    | -0.91759 | -0.61096 | 0.22441  |            |
| 8    | -0.04123 | -0.90705 | -0.79089 |            |
| 6    | 1.30475  | -0.96325 | -0.49263 |            |
| 6    | 2.02289  | 0.25525  | -0.34841 |            |
| 6    | 3.41447  | 0.18045  | -0.07728 |            |
| 6    | 4.03619  | -1.09141 | 0.03268  |            |
| 6    | 3.30858  | -2.23895 | -0.12382 |            |
| 6    | 1.91978  | -2.17785 | -0.38582 |            |
| 6    | 4.14342  | 1.38871  | 0.06928  |            |
| 6    | 3.52036  | 2.60104  | -0.05427 |            |
| 6    | 2.13541  | 2.66755  | -0.33402 |            |
| 6    | 1.40002  | 1.52213  | -0.47909 |            |
| 1    | 5.20614  | 1.33201  | 0.27818  |            |
| 1    | 4.08723  | 3.51733  | 0.06010  |            |
| 1    | 1.65640  | 3.63397  | -0.43409 |            |
| 1    | 0.34011  | 1.57009  | -0.69838 |            |
| 1    | 5.10012  | -1.13600 | 0.23658  |            |
| 1    | 3.78929  | -3.20643 | -0.04567 |            |
| 1    | 1.32919  | -3.07735 | -0.50836 |            |
| 1    | -3.59237 | 0.23065  | 2.90573  |            |
| 1    | -1.28918 | -0.35456 | 3.56950  |            |
| 1    | 0.42356  | -0.88766 | 1.85803  |            |

|   |          |          |          |
|---|----------|----------|----------|
| 1 | -5.25851 | 0.60973  | 1.11707  |
| 1 | -5.83906 | 0.68500  | -1.27626 |
| 1 | -4.12470 | 0.15992  | -2.99613 |
| 1 | -1.83125 | -0.45301 | -2.31402 |

E= -845.650593 (Hartree)

**TS naphalene+H (H addition)**

| Atom | X        | Y        | Z        | (Angstrom) |
|------|----------|----------|----------|------------|
| 6    | 0.00445  | 0.03635  | 0.02016  |            |
| 6    | 0.00550  | 0.01129  | 1.43783  |            |
| 6    | 1.24666  | -0.01829 | 2.12156  |            |
| 6    | 2.42779  | -0.02536 | 1.42755  |            |
| 6    | 2.42332  | -0.00055 | 0.01473  |            |
| 6    | 1.23680  | 0.03291  | -0.67144 |            |
| 6    | -1.24903 | 0.09528  | -0.67037 |            |
| 6    | -2.43572 | -0.00347 | 0.03651  |            |
| 6    | -2.42344 | -0.02032 | 1.44404  |            |
| 6    | -1.23534 | -0.00025 | 2.12997  |            |
| 1    | 1.24378  | -0.03651 | 3.20605  |            |
| 1    | 3.37102  | -0.04859 | 1.95995  |            |
| 1    | 3.36309  | -0.00465 | -0.52417 |            |
| 1    | 1.22731  | 0.06338  | -1.75577 |            |
| 1    | -1.22578 | -0.01437 | 3.21435  |            |
| 1    | -3.36110 | -0.05745 | 1.98542  |            |
| 1    | -3.37885 | -0.02952 | -0.49536 |            |
| 1    | -1.24784 | -0.00691 | -1.75014 |            |
| 1    | -1.23338 | 1.92701  | -1.02638 |            |

E= -386.303601 (Hartree)

**TS naphalene+H (H-abstraction by H)**

| Atom | X        | Y        | Z        | (Angstrom) |
|------|----------|----------|----------|------------|
| 6    | 0.00000  | 0.00000  | 0.00000  |            |
| 6    | 0.00000  | 0.00000  | 1.42125  |            |
| 6    | 1.24075  | 0.00000  | 2.10799  |            |
| 6    | 2.42262  | 0.00000  | 1.41803  |            |
| 6    | 2.42262  | 0.00000  | 0.00322  |            |
| 6    | 1.24075  | 0.00000  | -0.68675 |            |
| 6    | -1.24075 | 0.00000  | -0.68674 |            |
| 6    | -2.42262 | 0.00000  | 0.00322  |            |
| 6    | -2.42262 | 0.00000  | 1.41803  |            |
| 6    | -1.24075 | 0.00000  | 2.10799  |            |
| 1    | 1.23560  | 0.00000  | 3.19262  |            |
| 1    | 3.36433  | 0.00000  | 1.95349  |            |
| 1    | 3.36433  | 0.00000  | -0.53224 |            |
| 1    | 1.23560  | 0.00000  | -1.77137 |            |
| 1    | -1.23560 | 0.00000  | 3.19262  |            |
| 1    | -3.36433 | 0.00000  | 1.95349  |            |
| 1    | -3.36433 | 0.00000  | -0.53224 |            |
| 1    | -1.23458 | 0.00000  | -1.98673 |            |
| 1    | -1.34485 | -0.71088 | -2.97668 |            |

E= -386.282836 (Hartree)

**TS naphthalene+O (H-abstraction by O)**

| Atom | X        | Y        | Z        | (Angstrom) |
|------|----------|----------|----------|------------|
| 6    | 0.02506  | -0.05964 | 0.00540  |            |
| 6    | 0.02442  | -0.05509 | 1.42311  |            |
| 6    | 1.25842  | -0.00228 | 2.13529  |            |
| 6    | 2.46397  | 0.04499  | 1.38974  |            |
| 6    | 2.43996  | 0.03973  | 0.02110  |            |
| 6    | 1.21015  | -0.01312 | -0.67708 |            |
| 6    | -1.14165 | -0.10063 | 2.20764  |            |
| 6    | -1.18172 | -0.09858 | 3.56259  |            |
| 6    | 0.06047  | -0.04558 | 4.25192  |            |
| 6    | 1.23803  | 0.00094  | 3.55543  |            |
| 8    | -3.21518 | -0.19093 | 0.81756  |            |
| 1    | 3.40623  | 0.08543  | 1.92534  |            |
| 1    | 3.36783  | 0.07620  | -0.53673 |            |
| 1    | 1.21092  | -0.01668 | -1.76029 |            |
| 1    | -0.92767 | -0.10057 | -0.50919 |            |
| 1    | 2.18354  | 0.04137  | 4.08487  |            |
| 1    | 0.06317  | -0.04245 | 5.33541  |            |
| 1    | -2.11677 | -0.13553 | 4.10783  |            |
| 1    | -2.33028 | -0.15260 | 1.50623  |            |

E= -460.847796 (Hartree)

**TS naphthalene+OH (H-abstraction by OH)**

| Atom | X        | Y        | Z        | (Angstrom) |
|------|----------|----------|----------|------------|
| 6    | 0.02478  | 0.00545  | -0.03509 |            |
| 6    | 0.04946  | 0.01530  | 1.38412  |            |
| 6    | 1.29839  | 0.15847  | 2.05185  |            |
| 6    | 2.45260  | 0.28692  | 1.25002  |            |
| 6    | 2.42911  | 0.26525  | -0.11073 |            |
| 6    | 1.17692  | 0.12709  | -0.76442 |            |
| 6    | -1.12645 | -0.11562 | 2.16644  |            |
| 6    | -1.06027 | -0.10699 | 3.53373  |            |
| 6    | 0.18527  | 0.03482  | 4.19150  |            |
| 6    | 1.34031  | 0.16536  | 3.46924  |            |
| 1    | -2.07972 | -0.22209 | 1.65987  |            |
| 1    | -1.96525 | -0.20777 | 4.12084  |            |
| 1    | 0.21894  | 0.04255  | 5.27425  |            |
| 1    | 2.30401  | 0.27905  | 3.95276  |            |
| 1    | -0.93106 | -0.10268 | -0.53630 |            |
| 1    | 1.14253  | 0.11726  | -1.84729 |            |
| 1    | 3.34176  | 0.35807  | -0.68663 |            |
| 1    | 3.50851  | 0.44656  | 1.83335  |            |
| 8    | 4.52433  | 0.22070  | 2.57560  |            |
| 1    | 4.47215  | -0.74728 | 2.59965  |            |

E= -461.526073 (Hartree)

**TS naphthalene+OH (OH addition)**

| Atom | X        | Y        | Z        | (Angstrom) |
|------|----------|----------|----------|------------|
| 6    | -0.00549 | 0.04032  | -0.00681 |            |
| 6    | -0.01807 | -0.01123 | 1.40920  |            |
| 6    | 1.21439  | -0.04663 | 2.10591  |            |
| 6    | 2.40323  | -0.03529 | 1.42233  |            |



|   |          |          |          |
|---|----------|----------|----------|
| 6 | 2.41130  | 0.00738  | 0.01172  |
| 6 | 1.22979  | 0.03987  | -0.68696 |
| 6 | -1.25209 | 0.04443  | -0.71838 |
| 6 | -2.44900 | 0.10833  | -0.00952 |
| 6 | -2.45142 | 0.04567  | 1.39580  |
| 6 | -1.26800 | -0.01128 | 2.09053  |
| 1 | 1.20141  | -0.08288 | 3.18997  |
| 1 | 3.34150  | -0.06272 | 1.96322  |
| 1 | 3.35585  | 0.00869  | -0.51876 |
| 1 | 1.22670  | 0.05358  | -1.77106 |
| 1 | -1.26847 | -0.05053 | 3.17455  |
| 1 | -3.39394 | 0.05603  | 1.92945  |
| 1 | -3.38291 | 0.15833  | -0.55395 |
| 1 | -1.23839 | 0.24962  | -1.78036 |
| 8 | -1.46304 | -1.92502 | -1.25688 |
| 1 | -1.43010 | -2.28386 | -0.35735 |

E= -461.535824 (Hartree)

**TS 1+0 → 3+14**

| Atom | X        | Y        | Z        | (Angstrom) |
|------|----------|----------|----------|------------|
| 6    | 0.73419  | 0.50970  | 0.27211  |            |
| 6    | -0.20612 | 0.23353  | 1.25699  |            |
| 6    | 0.08764  | 0.48778  | 2.61426  |            |
| 6    | 1.34220  | 1.03541  | 2.93863  |            |
| 6    | 2.26804  | 1.31691  | 1.95005  |            |
| 6    | 1.96961  | 1.04841  | 0.61185  |            |
| 6    | -0.88246 | 0.17662  | 3.62221  |            |
| 6    | -2.09053 | -0.45836 | 3.29752  |            |
| 6    | -2.43122 | -0.70799 | 1.99543  |            |
| 6    | -1.57771 | -0.25087 | 0.87378  |            |
| 8    | -1.74689 | -0.80419 | -0.28686 |            |
| 6    | -2.62406 | 2.39379  | 0.52989  |            |
| 6    | -1.42592 | 3.11836  | 0.57424  |            |
| 6    | -0.94149 | 3.60755  | 1.79388  |            |
| 6    | -1.67281 | 3.44964  | 2.95076  |            |
| 6    | -2.94671 | 2.81955  | 2.93281  |            |
| 1    | 0.01938  | 4.10707  | 1.82388  |            |
| 1    | 1.57631  | 1.23155  | 3.97979  |            |
| 1    | 3.23069  | 1.73778  | 2.21553  |            |
| 1    | 2.70026  | 1.25871  | -0.16000 |            |
| 1    | 0.47786  | 0.29038  | -0.75835 |            |
| 1    | -0.64031 | 0.38696  | 4.65753  |            |
| 1    | -2.76175 | -0.75766 | 4.09453  |            |
| 1    | -3.34726 | -1.21777 | 1.72402  |            |
| 1    | -2.08378 | 0.95562  | 0.63434  |            |
| 1    | -3.07765 | 2.16647  | -0.43181 |            |
| 1    | -0.84576 | 3.25077  | -0.33080 |            |
| 6    | -3.72178 | 2.66001  | 4.10678  |            |
| 6    | -4.94608 | 2.04086  | 4.06135  |            |
| 6    | -5.45194 | 1.55599  | 2.83799  |            |
| 6    | -4.71465 | 1.69008  | 1.68506  |            |
| 6    | -3.45480 | 2.32169  | 1.70699  |            |
| 1    | -3.32938 | 3.03616  | 5.04581  |            |

|   |          |         |         |
|---|----------|---------|---------|
| 1 | -5.52990 | 1.92518 | 4.96684 |
| 1 | -6.42027 | 1.07126 | 2.81056 |
| 1 | -5.09130 | 1.30545 | 0.74273 |
| 1 | -1.29046 | 3.82084 | 3.89554 |

E= -846.712852 (Hartree)

**TS 4+0 → 2+14**

| Atom | X        | Y        | Z        | (Angstrom) |
|------|----------|----------|----------|------------|
| 6    | 0.15862  | 0.12775  | 0.21506  |            |
| 6    | -0.16922 | 0.10981  | 1.57763  |            |
| 6    | 0.80515  | 0.46351  | 2.54552  |            |
| 6    | 2.09551  | 0.82218  | 2.09678  |            |
| 6    | 2.40434  | 0.82521  | 0.75459  |            |
| 6    | 1.43339  | 0.47051  | -0.19521 |            |
| 6    | 0.46125  | 0.45028  | 3.92710  |            |
| 6    | -0.79437 | 0.04023  | 4.33966  |            |
| 6    | -1.76958 | -0.31639 | 3.41195  |            |
| 6    | -1.53931 | -0.12049 | 2.02551  |            |
| 8    | -2.43669 | -0.68759 | 1.11047  |            |
| 6    | -2.34154 | 2.51932  | 1.70039  |            |
| 6    | -2.45182 | 2.82306  | 3.11944  |            |
| 6    | -1.33965 | 3.39999  | 3.78328  |            |
| 6    | -0.19462 | 3.77484  | 3.02607  |            |
| 6    | -0.17477 | 3.63469  | 1.64961  |            |
| 6    | -1.25450 | 3.07020  | 0.97434  |            |
| 6    | -1.40245 | 3.57436  | 5.18457  |            |
| 6    | -2.51926 | 3.19676  | 5.89479  |            |
| 6    | -3.62062 | 2.63065  | 5.23129  |            |
| 6    | -3.57823 | 2.44142  | 3.86404  |            |
| 1    | 0.68994  | 3.96850  | 1.08801  |            |
| 1    | 2.84418  | 1.09770  | 2.83209  |            |
| 1    | 3.40032  | 1.10144  | 0.42896  |            |
| 1    | 1.68102  | 0.47343  | -1.24988 |            |
| 1    | -0.60817 | -0.12697 | -0.50725 |            |
| 1    | 1.21324  | 0.73452  | 4.65431  |            |
| 1    | -1.02572 | -0.00607 | 5.39736  |            |
| 1    | -2.75299 | -0.64524 | 3.72605  |            |
| 1    | -1.94003 | 1.19813  | 1.86311  |            |
| 1    | -3.26306 | 2.29656  | 1.16591  |            |
| 1    | -1.23265 | 2.97881  | -0.10460 |            |
| 1    | -0.55027 | 4.01193  | 5.69395  |            |
| 1    | -2.55218 | 3.33812  | 6.96869  |            |
| 1    | -4.49922 | 2.33818  | 5.79359  |            |
| 1    | -4.42005 | 1.99224  | 3.34651  |            |
| 1    | 0.65424  | 4.20503  | 3.54573  |            |
| 1    | -2.22258 | -1.62351 | 1.03767  |            |

E= -847.362625 (Hartree)

**12**

| Atom | X        | Y       | Z        | (Angstrom) |
|------|----------|---------|----------|------------|
| 6    | -0.02122 | 0.00015 | -0.00164 |            |
| 6    | -0.00692 | 0.00017 | 1.43405  |            |
| 6    | 1.22294  | 0.00032 | 2.12684  |            |

|   |          |          |          |
|---|----------|----------|----------|
| 6 | 2.53490  | 0.00057  | 1.37573  |
| 6 | 2.39469  | 0.00036  | -0.11331 |
| 6 | 1.17738  | 0.00021  | -0.73079 |
| 6 | -1.20375 | -0.00000 | 2.17450  |
| 6 | -1.18777 | -0.00003 | 3.55650  |
| 6 | 0.03089  | 0.00011  | 4.23635  |
| 6 | 1.21986  | 0.00028  | 3.51792  |
| 1 | -2.14714 | -0.00012 | 1.63900  |
| 1 | -2.11931 | -0.00016 | 4.10967  |
| 1 | 0.05138  | 0.00009  | 5.31939  |
| 1 | 2.16828  | 0.00039  | 4.04652  |
| 1 | -0.97559 | 0.00003  | -0.51312 |
| 1 | 1.13275  | 0.00011  | -1.81433 |
| 1 | 3.30454  | 0.00038  | -0.70191 |
| 1 | 3.13023  | -0.86907 | 1.68914  |
| 1 | 3.12978  | 0.87061  | 1.68894  |

E= -386.364079 (Hartree)

### TS 5-13

| Atom | X        | Y        | Z        | (Angstrom) |
|------|----------|----------|----------|------------|
| 6    | -0.02204 | -0.01176 | -0.10528 |            |
| 6    | -0.15902 | 0.28428  | 1.24781  |            |
| 6    | 0.97607  | 0.37843  | 2.07064  |            |
| 6    | 2.23717  | 0.25123  | 1.54096  |            |
| 6    | 2.42191  | 0.05570  | 0.14482  |            |
| 6    | 1.28470  | -0.03876 | -0.69617 |            |
| 6    | 1.46482  | -0.22238 | -2.08468 |            |
| 6    | 2.72404  | -0.30778 | -2.62295 |            |
| 6    | 3.85987  | -0.21889 | -1.78773 |            |
| 6    | 3.71143  | -0.04089 | -0.43653 |            |
| 6    | -0.39568 | -2.26121 | -0.05799 |            |
| 6    | 0.69729  | -3.05248 | -0.19187 |            |
| 6    | 0.53179  | -4.45546 | -0.03304 |            |
| 6    | -0.69956 | -4.98177 | 0.25019  |            |
| 6    | -1.83794 | -4.14487 | 0.39122  |            |
| 6    | -1.68893 | -2.73284 | 0.23693  |            |
| 6    | -2.83093 | -1.90165 | 0.37877  |            |
| 6    | -4.05783 | -2.44123 | 0.65824  |            |
| 6    | -4.20675 | -3.83971 | 0.81095  |            |
| 6    | -3.12452 | -4.66748 | 0.68015  |            |
| 1    | 1.67461  | -2.63851 | -0.42022 |            |
| 1    | 1.39227  | -5.10634 | -0.13978 |            |
| 1    | -0.82556 | -6.05221 | 0.37143  |            |
| 1    | -3.23510 | -5.74079 | 0.79507  |            |
| 1    | -5.18394 | -4.25245 | 1.03119  |            |
| 1    | -4.92263 | -1.79711 | 0.76324  |            |
| 1    | -2.72025 | -0.83047 | 0.25787  |            |
| 1    | -1.14648 | 0.39230  | 1.68033  |            |
| 1    | 0.85098  | 0.55967  | 3.13144  |            |
| 1    | 3.11200  | 0.32034  | 2.17805  |            |
| 1    | 4.58072  | 0.02825  | 0.20883  |            |
| 1    | 4.85032  | -0.29189 | -2.22084 |            |
| 1    | 2.85147  | -0.44999 | -3.68925 |            |

|   |          |          |          |
|---|----------|----------|----------|
| 1 | 0.58740  | -0.31155 | -2.71653 |
| 1 | -0.87553 | 0.06323  | -0.77053 |

E= -770.936110 (Hartree)

**13**

| Atom | X        | Y        | Z        | (Angstrom) |
|------|----------|----------|----------|------------|
| 6    | 0.11126  | -0.30123 | -0.23381 |            |
| 6    | -0.05194 | -0.12568 | 1.16420  |            |
| 6    | 1.09931  | 0.01237  | 1.99190  |            |
| 6    | 2.37635  | -0.01691 | 1.36699  |            |
| 6    | 2.50085  | -0.18418 | 0.01277  |            |
| 6    | 1.35571  | -0.33160 | -0.80082 |            |
| 6    | 0.92138  | 0.17713  | 3.40266  |            |
| 6    | -0.34909 | 0.22543  | 3.92019  |            |
| 6    | -1.48730 | 0.09626  | 3.09371  |            |
| 6    | -1.34380 | -0.08126 | 1.74674  |            |
| 6    | 2.13843  | 0.37153  | 4.31578  |            |
| 6    | 2.56334  | 1.81183  | 4.21590  |            |
| 6    | 2.53672  | 2.66106  | 5.28443  |            |
| 6    | 2.17921  | 2.22282  | 6.56744  |            |
| 6    | 1.87537  | 0.84147  | 6.80919  |            |
| 6    | 1.87943  | -0.07819 | 5.74012  |            |
| 6    | 1.62672  | -1.42288 | 5.99513  |            |
| 6    | 1.35764  | -1.87278 | 7.28091  |            |
| 6    | 1.33407  | -0.96415 | 8.34108  |            |
| 6    | 1.59120  | 0.37284  | 8.10693  |            |
| 1    | -0.48314 | 0.35631  | 4.98803  |            |
| 1    | -2.47401 | 0.13400  | 3.53955  |            |
| 1    | -2.21045 | -0.18802 | 1.10359  |            |
| 1    | -0.77715 | -0.41027 | -0.84684 |            |
| 1    | 1.46768  | -0.46459 | -1.87010 |            |
| 1    | 3.48556  | -0.20216 | -0.43890 |            |
| 1    | 3.27267  | 0.10147  | 1.96303  |            |
| 1    | 2.82944  | 2.17765  | 3.23049  |            |
| 1    | 2.80038  | 3.70260  | 5.13848  |            |
| 1    | 2.15883  | 2.91547  | 7.39979  |            |
| 1    | 1.58356  | 1.08248  | 8.92753  |            |
| 1    | 1.11986  | -1.30715 | 9.34629  |            |
| 1    | 1.16458  | -2.92362 | 7.45882  |            |
| 1    | 1.62865  | -2.12274 | 5.16487  |            |
| 1    | 2.94099  | -0.26682 | 3.92522  |            |

E= -770.988975 (Hartree)

**TS 13-14 (H loss)**

| Atom | X        | Y        | Z        | (Angstrom) |
|------|----------|----------|----------|------------|
| 6    | 0.03402  | -0.68093 | 0.09334  |            |
| 6    | -0.03123 | -0.33911 | 1.46765  |            |
| 6    | 1.04506  | 0.37235  | 2.05878  |            |
| 6    | 2.17846  | 0.66318  | 1.26189  |            |
| 6    | 2.21702  | 0.31427  | -0.06426 |            |
| 6    | 1.12806  | -0.35446 | -0.66196 |            |
| 6    | 0.98410  | 0.68619  | 3.47627  |            |
| 6    | -0.18187 | 0.37558  | 4.17470  |            |

|   |          |          |          |
|---|----------|----------|----------|
| 6 | -1.22475 | -0.35197 | 3.57848  |
| 6 | -1.15366 | -0.70735 | 2.25738  |
| 6 | 1.91686  | 1.68395  | 4.09414  |
| 6 | 2.51401  | 1.48049  | 5.38253  |
| 6 | 3.33041  | 2.51307  | 5.92809  |
| 6 | 3.52701  | 3.71582  | 5.20450  |
| 6 | 2.93303  | 3.89538  | 3.98740  |
| 6 | 2.12630  | 2.87672  | 3.43915  |
| 6 | 2.33757  | 0.29779  | 6.15457  |
| 6 | 2.93586  | 0.15400  | 7.37835  |
| 6 | 3.74771  | 1.17969  | 7.91051  |
| 6 | 3.93775  | 2.33049  | 7.19786  |
| 1 | 1.64753  | 3.04031  | 2.48039  |
| 1 | 3.07041  | 4.81874  | 3.43770  |
| 1 | 4.14948  | 4.48983  | 5.63999  |
| 1 | 4.55768  | 3.12912  | 7.59088  |
| 1 | 4.21570  | 1.05045  | 8.87897  |
| 1 | 2.78672  | -0.75836 | 7.94355  |
| 1 | 1.72370  | -0.50584 | 5.77148  |
| 1 | -0.27755 | 0.70645  | 5.20228  |
| 1 | -2.09917 | -0.60545 | 4.16590  |
| 1 | -1.96183 | -1.25632 | 1.78700  |
| 1 | -0.80134 | -1.21494 | -0.34655 |
| 1 | 1.16874  | -0.62271 | -1.71077 |
| 1 | 3.09607  | 0.54230  | -0.65514 |
| 1 | 3.03297  | 1.14775  | 1.71707  |
| 1 | 2.00575  | -0.77804 | 3.77395  |

E= -770.928493 (Hartree)

**TS 13-14 (H-abstraction by O<sub>2</sub>)**

| Atom | X        | Y        | Z        | (Angstrom) |
|------|----------|----------|----------|------------|
| 6    | -0.03120 | -0.01214 | 0.00936  |            |
| 6    | -0.01948 | 0.01376  | 1.42761  |            |
| 6    | 1.22623  | -0.00855 | 2.11916  |            |
| 6    | 2.41931  | -0.04925 | 1.34465  |            |
| 6    | 2.37305  | -0.06780 | -0.02398 |            |
| 6    | 1.13484  | -0.05021 | -0.70390 |            |
| 6    | -1.23039 | 0.06670  | 2.16247  |            |
| 6    | -1.20960 | 0.11085  | 3.52801  |            |
| 6    | 0.02181  | 0.09521  | 4.21854  |            |
| 6    | 1.22012  | 0.02134  | 3.55028  |            |
| 6    | 2.51758  | 0.06506  | 4.33281  |            |
| 6    | 2.59356  | -0.63993 | 5.63179  |            |
| 6    | 3.50208  | -0.18028 | 6.62097  |            |
| 6    | 4.24214  | 1.00785  | 6.40430  |            |
| 6    | 4.07661  | 1.75635  | 5.24440  |            |
| 6    | 3.20620  | 1.33991  | 4.25983  |            |
| 6    | 1.86951  | -1.82374 | 5.87082  |            |
| 6    | 2.01935  | -2.51746 | 7.04935  |            |
| 6    | 2.91823  | -2.06365 | 8.03339  |            |
| 6    | 3.64742  | -0.92282 | 7.81966  |            |
| 8    | 4.22482  | -1.73301 | 3.41414  |            |
| 8    | 4.55648  | -2.21056 | 4.50158  |            |

|   |          |          |          |
|---|----------|----------|----------|
| 1 | 0.02304  | 0.14144  | 5.30160  |
| 1 | -2.13393 | 0.16341  | 4.09058  |
| 1 | -2.16933 | 0.07955  | 1.61972  |
| 1 | -0.98930 | 0.00231  | -0.49903 |
| 1 | 1.11431  | -0.06691 | -1.78689 |
| 1 | 3.29549  | -0.09982 | -0.59115 |
| 1 | 3.38567  | -0.06398 | 1.83200  |
| 1 | 3.04409  | 1.94913  | 3.37766  |
| 1 | 4.61346  | 2.68981  | 5.12505  |
| 1 | 4.92832  | 1.33966  | 7.17528  |
| 1 | 4.34995  | -0.56875 | 8.56621  |
| 1 | 3.03740  | -2.62240 | 8.95389  |
| 1 | 1.45597  | -3.42782 | 7.21425  |
| 1 | 1.19710  | -2.19184 | 5.10508  |
| 1 | 3.27673  | -0.70099 | 3.72168  |

E= -921.276801 (Hartree)

**TS 13+14 (H-abstraction by OH)**

| Atom | X        | Y        | Z        | (Angstrom) |
|------|----------|----------|----------|------------|
| 6    | 0.17589  | 0.50553  | 0.06126  |            |
| 6    | 0.13438  | 0.26143  | 1.44873  |            |
| 6    | 1.28587  | -0.25029 | 2.08272  |            |
| 6    | 2.42358  | -0.51927 | 1.32251  |            |
| 6    | 2.44574  | -0.28269 | -0.04613 |            |
| 6    | 1.31348  | 0.23897  | -0.67626 |            |
| 6    | -1.05722 | 0.50333  | 2.21232  |            |
| 6    | -1.10394 | 0.19212  | 3.57751  |            |
| 6    | -0.02203 | -0.31931 | 4.23638  |            |
| 6    | 1.30757  | -0.53395 | 3.57209  |            |
| 6    | 2.35621  | 0.29004  | 4.32534  |            |
| 6    | 2.91271  | -0.20336 | 5.54804  |            |
| 6    | 3.84124  | 0.61047  | 6.25812  |            |
| 6    | 4.18780  | 1.88736  | 5.74793  |            |
| 6    | 3.63340  | 2.33993  | 4.58410  |            |
| 6    | 2.71358  | 1.53628  | 3.87473  |            |
| 6    | 2.58031  | -1.47243 | 6.09736  |            |
| 6    | 3.13798  | -1.90372 | 7.27217  |            |
| 6    | 4.06177  | -1.09421 | 7.96926  |            |
| 6    | 4.40298  | 0.13249  | 7.46963  |            |
| 1    | 2.28479  | 1.91132  | 2.95222  |            |
| 1    | 3.89495  | 3.31719  | 4.19594  |            |
| 1    | 4.89611  | 2.49476  | 6.30065  |            |
| 1    | 5.10980  | 0.76538  | 7.99566  |            |
| 1    | 4.49595  | -1.44801 | 8.89655  |            |
| 1    | 2.86982  | -2.87562 | 7.66911  |            |
| 1    | 1.87532  | -2.11680 | 5.58690  |            |
| 1    | -0.07880 | -0.54053 | 5.29613  |            |
| 1    | -2.02326 | 0.36304  | 4.12623  |            |
| 1    | -1.92563 | 0.91028  | 1.70939  |            |
| 1    | -0.70868 | 0.90319  | -0.42455 |            |
| 1    | 1.32583  | 0.43069  | -1.74259 |            |
| 1    | 3.33875  | -0.49911 | -0.61968 |            |
| 1    | 3.30159  | -0.91804 | 1.82095  |            |

|   |         |          |         |
|---|---------|----------|---------|
| 1 | 1.58798 | -1.59260 | 3.68312 |
| 8 | 1.37400 | -3.29945 | 2.30499 |
| 1 | 1.16086 | -2.75756 | 1.52500 |

E= -846.719150 (Hartree)

**TS 13-14 (H-abstraction by O)**

| Atom | X        | Y        | Z        | (Angstrom) |
|------|----------|----------|----------|------------|
| 6    | 4.21409  | -0.54767 | -0.30120 |            |
| 6    | 2.85461  | -0.70707 | -0.66957 |            |
| 6    | 1.86681  | 0.12940  | -0.07569 |            |
| 6    | 2.30045  | 1.12604  | 0.84596  |            |
| 6    | 3.62654  | 1.24950  | 1.18456  |            |
| 6    | 4.59486  | 0.39978  | 0.61193  |            |
| 6    | 2.46508  | -1.68655 | -1.61708 |            |
| 6    | 1.14891  | -1.83377 | -1.95475 |            |
| 6    | 0.16346  | -1.02761 | -1.34412 |            |
| 6    | 0.49342  | -0.07462 | -0.41234 |            |
| 6    | -0.59335 | 0.78884  | 0.23423  |            |
| 6    | -1.91936 | 0.06752  | 0.36030  |            |
| 6    | -3.07882 | 0.54824  | -0.28136 |            |
| 6    | -3.02425 | 1.76087  | -1.04662 |            |
| 6    | -1.83657 | 2.49795  | -1.13334 |            |
| 6    | -0.68573 | 2.08054  | -0.52570 |            |
| 6    | -1.99230 | -1.09001 | 1.13084  |            |
| 6    | -3.18529 | -1.78664 | 1.26530  |            |
| 6    | -4.33407 | -1.32613 | 0.61743  |            |
| 6    | -4.28019 | -0.17445 | -0.14301 |            |
| 8    | 1.15511  | -0.26299 | 2.64710  |            |
| 1    | -0.87897 | -1.17827 | -1.60156 |            |
| 1    | 0.84944  | -2.58045 | -2.68031 |            |
| 1    | 3.22840  | -2.31413 | -2.06369 |            |
| 1    | 4.95169  | -1.19901 | -0.75800 |            |
| 1    | 5.63690  | 0.50708  | 0.88725  |            |
| 1    | 3.93067  | 2.01403  | 1.88927  |            |
| 1    | 1.58731  | 1.82063  | 1.27041  |            |
| 1    | 0.22731  | 2.65686  | -0.62611 |            |
| 1    | -1.82888 | 3.42094  | -1.70234 |            |
| 1    | -3.92301 | 2.10598  | -1.54275 |            |
| 1    | -5.17067 | 0.19390  | -0.64126 |            |
| 1    | -5.26729 | -1.86771 | 0.71534  |            |
| 1    | -3.22280 | -2.68506 | 1.86925  |            |
| 1    | -1.09091 | -1.45083 | 1.61828  |            |
| 1    | -0.26068 | 0.99874  | 1.26274  |            |

E= -846.022841 (Hartree)

**14**

| Atom | X       | Y        | Z        | (Angstrom) |
|------|---------|----------|----------|------------|
| 6    | 0.21533 | -0.27699 | 0.16900  |            |
| 6    | 0.01108 | -0.08837 | 1.56063  |            |
| 6    | 1.12818 | -0.14409 | 2.43883  |            |
| 6    | 2.41723 | -0.37083 | 1.88696  |            |
| 6    | 2.58098 | -0.54753 | 0.53910  |            |
| 6    | 1.46797 | -0.50432 | -0.33161 |            |

|    |             |           |          |
|----|-------------|-----------|----------|
| 6  | 0.91799     | 0.04042   | 3.84228  |
| 6  | -0.34961    | 0.28803   | 4.31000  |
| 6  | -1.45653    | 0.34979   | 3.43259  |
| 6  | -1.28133    | 0.15997   | 2.09030  |
| 6  | 2.05980     | -0.02124  | 4.79926  |
| 6  | 2.70678     | -1.26461  | 5.08800  |
| 6  | 3.79904     | -1.27897  | 5.99848  |
| 6  | 4.21518     | -0.06760  | 6.60837  |
| 6  | 3.57190     | 1.10604   | 6.33049  |
| 6  | 2.49015     | 1.12589   | 5.42036  |
| 6  | 2.29015     | -2.49121  | 4.50531  |
| 6  | 2.93536     | -3.66208  | 4.80116  |
| 6  | 4.02911     | -3.67319  | 5.69692  |
| 6  | 4.44666     | -2.50941  | 6.28230  |
| 1  | 1.99659     | 2.06404   | 5.19242  |
| 1  | 3.89003     | 2.02939   | 6.79952  |
| 1  | 5.05071     | -0.09225  | 7.29964  |
| 1  | 5.28045     | -2.50800  | 6.97623  |
| 1  | 4.53045     | -4.60727  | 5.92074  |
| 1  | 2.60542     | -4.58908  | 4.34772  |
| 1  | 1.44950     | -2.49003  | 3.82188  |
| 1  | -0.49999    | 0.42257   | 5.37534  |
| 1  | -2.44422    | 0.54181   | 3.83430  |
| 1  | -2.12505    | 0.19825   | 1.40968  |
| 1  | -0.64442    | -0.23513  | -0.49116 |
| 1  | 1.61289     | -0.64678  | -1.39587 |
| 1  | 3.57097     | -0.72006  | 0.13419  |
| 1  | 3.27477     | -0.40016  | 2.54844  |
| E= | -770.441397 | (Hartree) |          |
